# Supplementary material for: Steroidal Glycosides from Convallaria majalis Whole Plants and Their Cytotoxic Activity
Source: MDPI journal article supplement (doi:10.3390/ijms18112358), 2017-11-07

# Steroidal glycosides from *Convallaria majalis* whole plants and Their Cytotoxic Activity

Yukiko Matsuo, Daisuke Shinoda, Aina Nakamaru, Kuni Kamohara, Hiroshi Sakagami, and Yoshihiro Mimaki

## Supplementary Materials

Fig. 1.2.  $^1\text{H}$  and  $^{13}\text{C}$  NMR spectral for **4**

Fig. 3.4 HMBC and MS spectrometry for **4**

Fig. 5.6.  $^1\text{H}$  and  $^{13}\text{C}$  NMR spectral for **5**

Fig. 7.8 HMBC and MS spectrometry for **5**

Fig. 9.10.  $^1\text{H}$  and  $^{13}\text{C}$  NMR spectral for **6**

Fig. 11.12 HMBC and MS spectrometry for **6**

Fig. 13.14.  $^1\text{H}$  and  $^{13}\text{C}$  NMR spectral for **10**

Fig. 15.16 HMBC and MS spectrometry for **10**

Fig. 17.18.  $^1\text{H}$  and  $^{13}\text{C}$  NMR spectral for **11**

Fig. 19.20 HMBC and MS spectrometry for **11**

Fig. 21.22.  $^1\text{H}$  and  $^{13}\text{C}$  NMR spectral for **12**

Fig. 23.24 HMBC and MS spectrometry for **12**

Fig. 25.26.  $^1\text{H}$  and  $^{13}\text{C}$  NMR spectral for **13**

Fig. 27.28 HMBC and MS spectrometry for **13**

Fig. 29.30.  $^1\text{H}$  and  $^{13}\text{C}$  NMR spectral for **13a**

Fig. 31.32 HMBC and MS spectrometry for **13a**

Fig. 33.34.  $^1\text{H}$  and  $^{13}\text{C}$  NMR spectral for **14**

Fig. 35.36 HMBC and MS spectrometry for **14**

Fig. 37.38.  $^1\text{H}$  and  $^{13}\text{C}$  NMR spectral for **15**

Fig. 39.40 HMBC and MS spectrometry for **15**

Fig.41. Toxicity curves of **1** and **8**.

Chemical shift (ppm) labels above the spectrum: 8.3984, 8.3118, 7.7781, 7.5746, 7.3178, 7.2091, 7.0466, 7.0008, 6.9191, 6.8177, 6.7401, 6.5882, 6.6044, 6.5006, 6.4232, 6.2532, 6.2457, 6.1818, 6.1544, 6.1095, 6.0747, 6.0204, 5.9470, 5.8430, 5.7925, 5.5025, 4.8264, 4.7125, 4.7412, 4.6938, 4.1368, 4.0938, 3.8237, 3.8135, 3.7131, 3.6938, 3.4420, 3.4232, 2.7403, 2.7374, 2.7174, 2.6600, 2.6435, 2.5925, 2.1382, 2.0938, 2.0540, 2.0400, 1.8510, 1.8444, 1.5144, 1.4942, 1.3819, 1.3604, 1.3144, 1.2991, 1.2863, 1.2711, 1.0710, 1.0716, 1.0675, 0.8923, 0.8166.

Integration values below the baseline: 12.843, 0.507, 0.432, 3.984, 0.295, 11.524, 2.030, 1.255, 0.515, 1.000, 0.780, 3.183, 1.279, 1.175, 0.832, 1.784, 1.615, 2.051, 2.051, 2.051, 2.051, 3.940, 1.799, 2.981, 2.981, 4.115, 11.620, 5.553, 3.553, 3.933, 3.933, 1.123, 3.989, 2.560, 2.544, 1.820, 2.427, 3.073, 1.213, 0.711, 3.353, 3.353, 1.749, 1.054, 1.355, 3.189, 3.189, 2.244, 2.251.

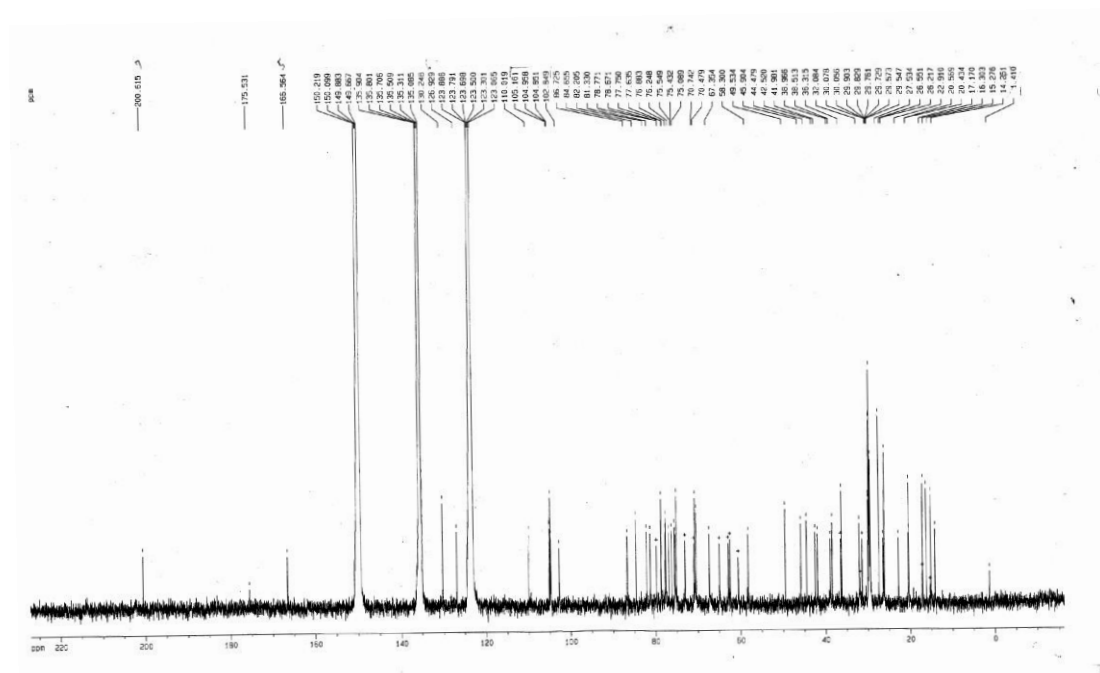

Fig. 3.4. HMBC and MS spectrometry for 4

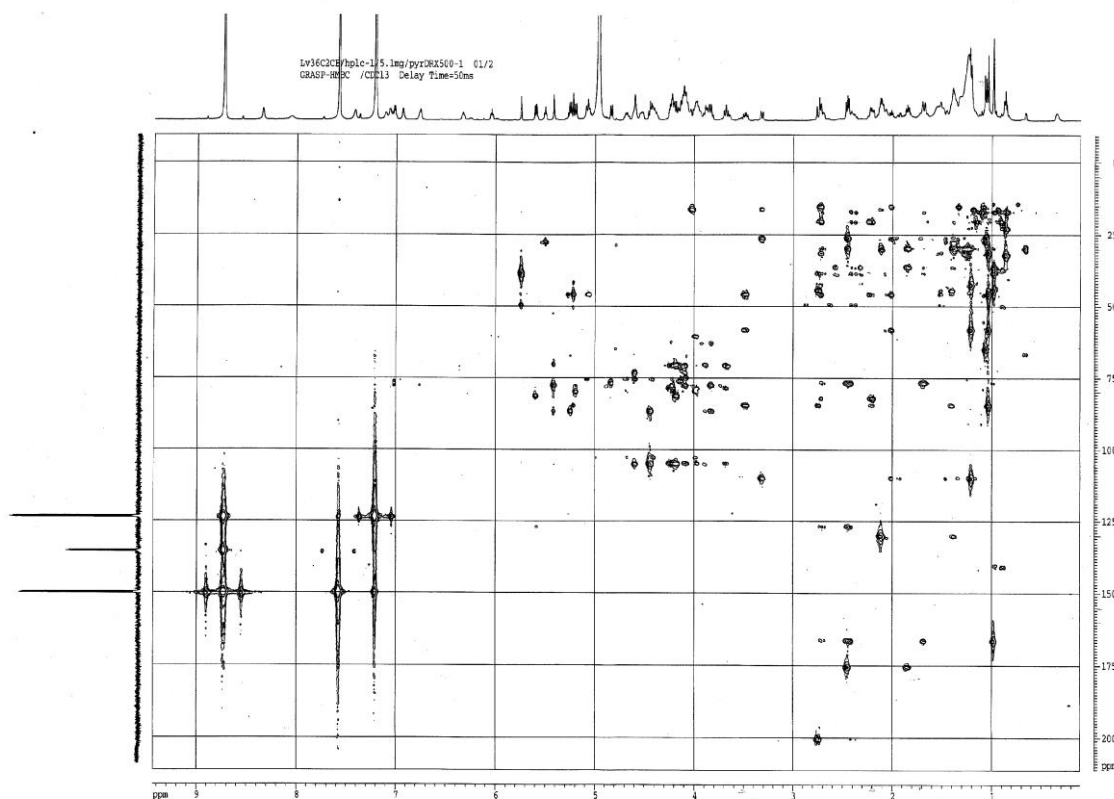

# Elemental Composition Report

Page 1

## Single Mass Analysis

Tolerance = 10.0 PPM / DBE: min = -1.5, max = 60.0

Element prediction: Off

Number of isotope peaks used for i-FIT = 3

Monoisotopic Mass, Even Electron Ions

17 formula(e) evaluated with 2 results within limits (all results (up to 1000) for each mass)

Elements Used:

C: 20-80 H: 30-80 O: 23-24 Na: 0-1

LV36C2CEH1

SHINODA 001 104 (1.964) AM (Cen,4, 80.00, Ar,0.0,0.00,0.70); Sm (SG, 1x3.00); Cm (99:107)

TOF MS ES+  
1.89e+004

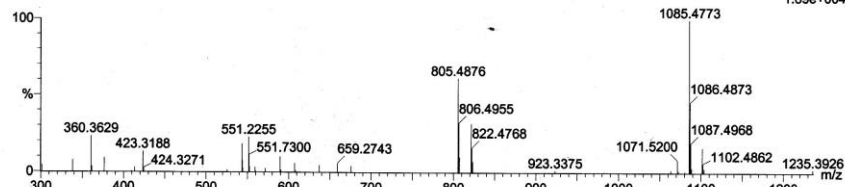

Minimum:  
Maximum:

|           |            |      |      |      |       |                |  |  |  |
|-----------|------------|------|------|------|-------|----------------|--|--|--|
|           |            | 5.0  | 10.0 | -1.5 |       |                |  |  |  |
| Mass      | Calc. Mass | mDa  | PPM  | DBE  | i-FIT | Formula        |  |  |  |
| 1085.4773 | 1085.4781  | -0.8 | -0.7 | 11.5 | 179.3 | C50 H78 O24 Na |  |  |  |
|           | 1085.4805  | -3.2 | -2.9 | 14.5 | 245.2 | C52 H77 O24    |  |  |  |

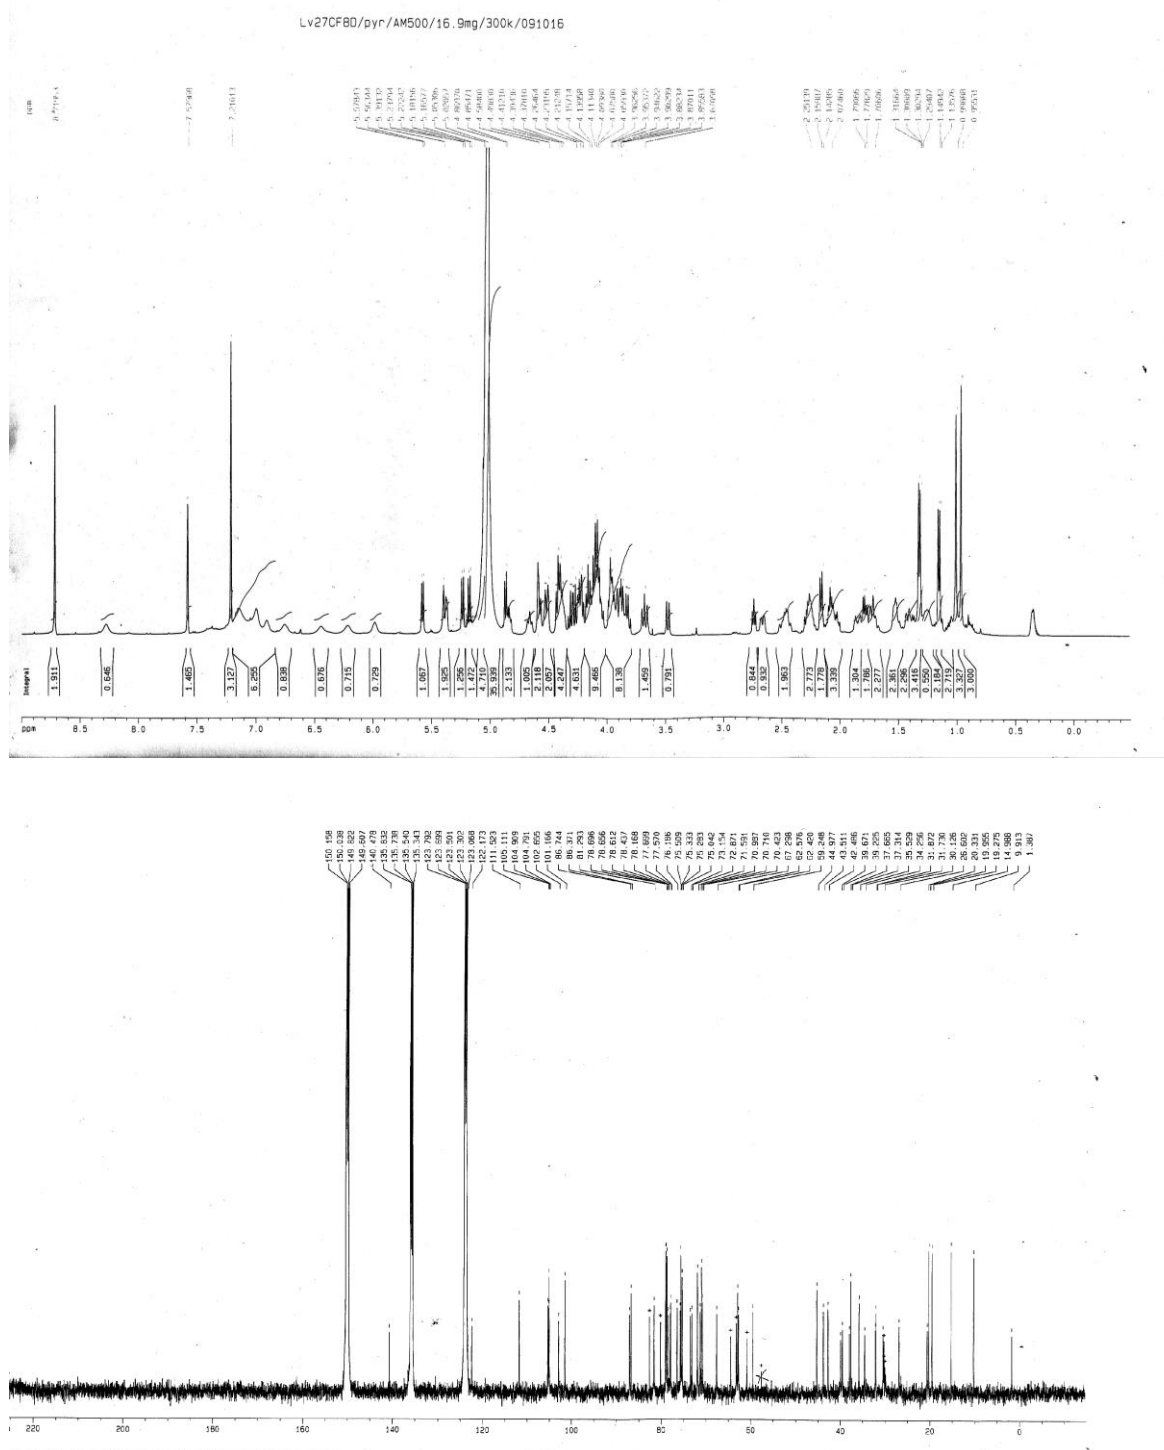

Fig. 7.8. HMBC and MS spectrometry for **5**

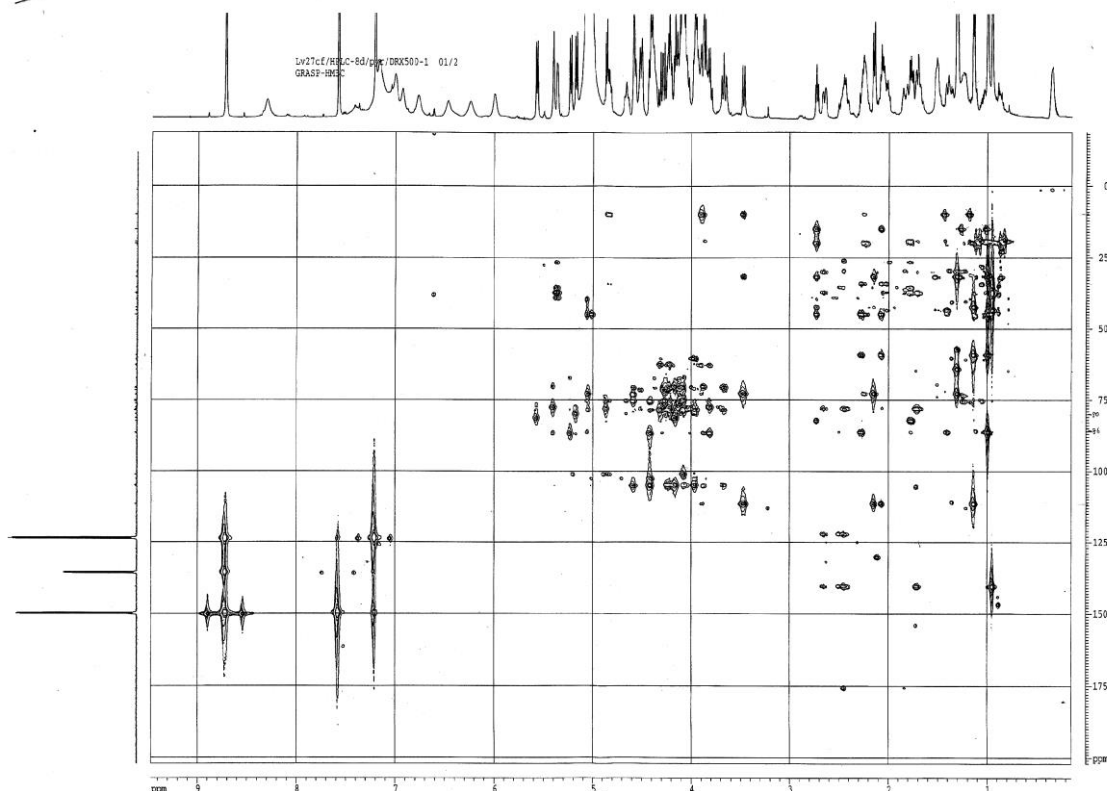

# Elemental Composition Report

Page 1

## Single Mass Analysis

Tolerance = 10.0 PPM / DBE: min = -1.5, max = 60.0

Element prediction: Off

Number of isotope peaks used for i-FIT = 3

Monoisotopic Mass, Even Electron Ions

143 formula(e) evaluated with 5 results within limits (all results (up to 1000) for each mass)

Elements Used:

C: 20-80 H: 30-100 B: 0-1 O: 27-29 Na: 0-1 I: 0-1

LV 27CF8D

SHINODA 001 24 (0.460) AM (Cen,4, 80.00, Ar,0.0,0.00,0.70); Sm (SG, 1x3.00); Cm (21:32)

1: TOF MS ES+  
5.69e+004

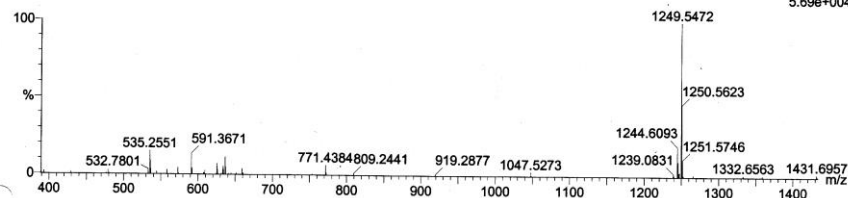

| Minimum:  |            |      |      |      |        |         |              |
|-----------|------------|------|------|------|--------|---------|--------------|
| Maximum:  |            |      |      |      |        |         |              |
|           | 5.0        | 10.0 | -1.5 |      |        |         |              |
|           |            |      | 60.0 |      |        |         |              |
| Mass      | Calc. Mass | mDa  | PPM  | DBE  | i-FIT  | Formula |              |
| 1249.5472 | 1249.5465  | 0.7  | 0.6  | 11.5 | 3993.0 | C56     | H90 O29 Na   |
|           | 1249.5461  | 1.1  | 0.9  | -1.5 | 1404.3 | C47     | H99 B O28 I  |
|           | 1249.5490  | -1.8 | -1.4 | 14.5 | 4548.9 | C58     | H89 O29      |
|           | 1249.5450  | 2.2  | 1.8  | 18.5 | 4046.8 | C60     | H86 B O27    |
|           | 1249.5425  | 4.7  | 3.8  | 15.5 | 3556.8 | C58     | H87 B O27 Na |

Fig. 9.10.  $^1\text{H}$  and  $^{13}\text{C}$  NMR spectral for **6**

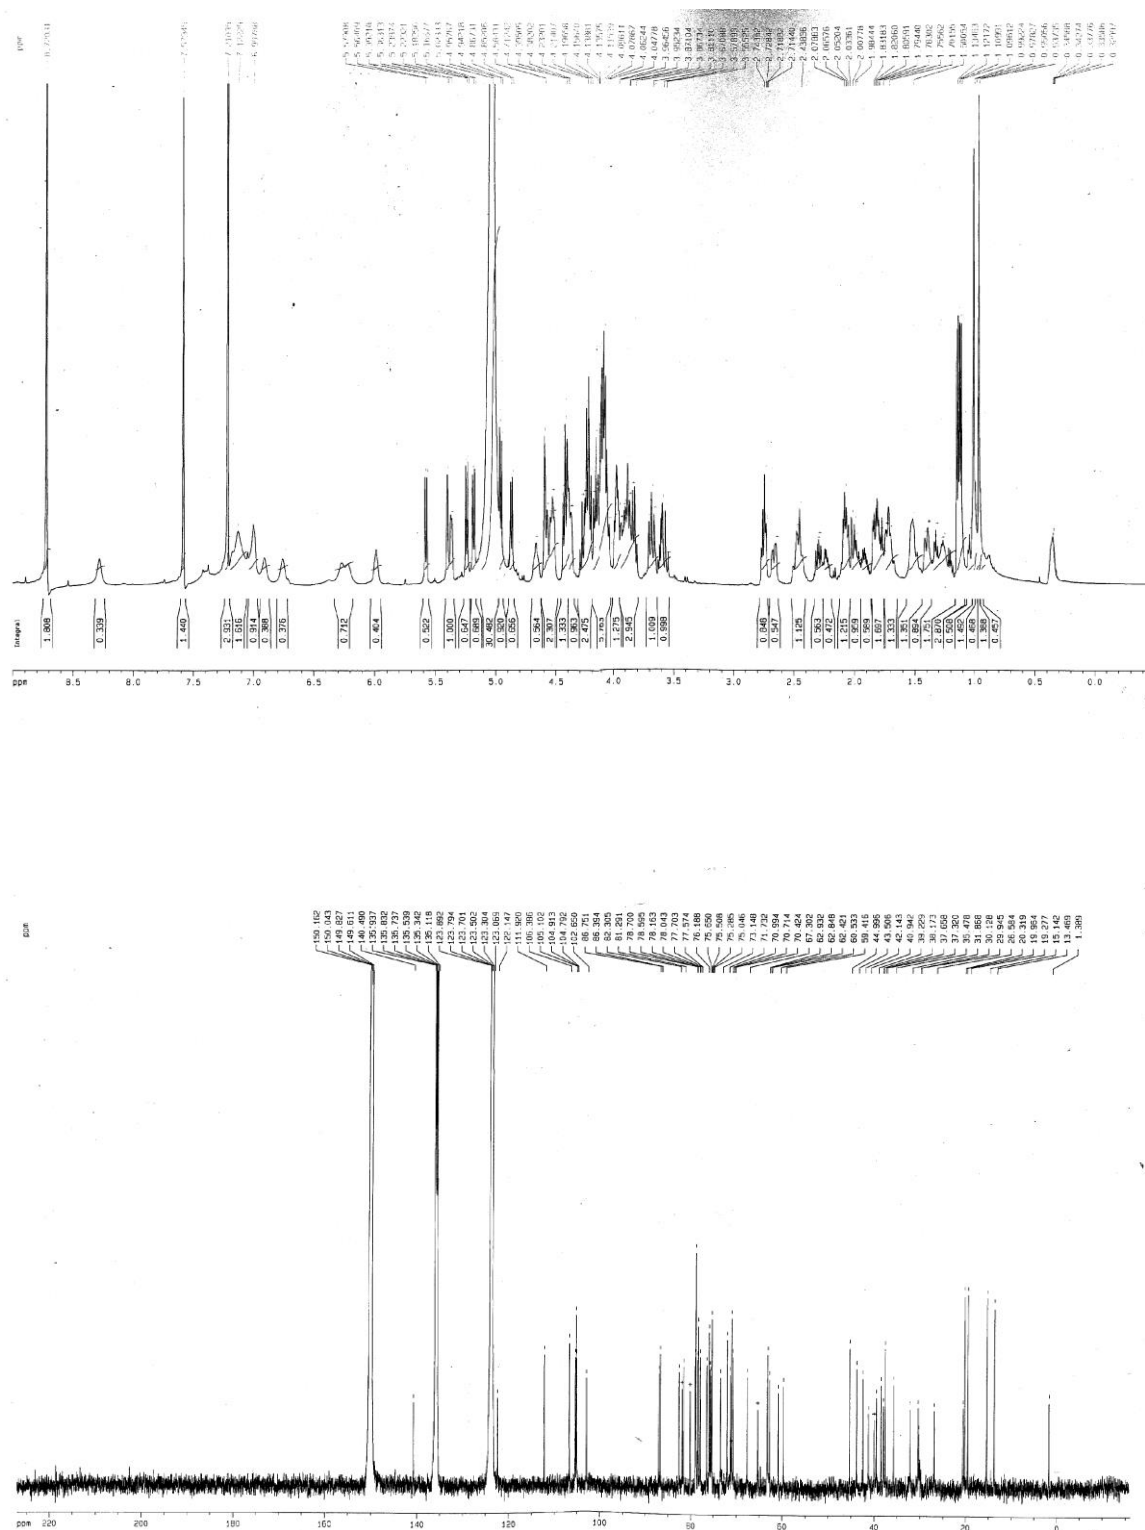

Fig. 11.12. HMBC and MS spectrometry for **6**

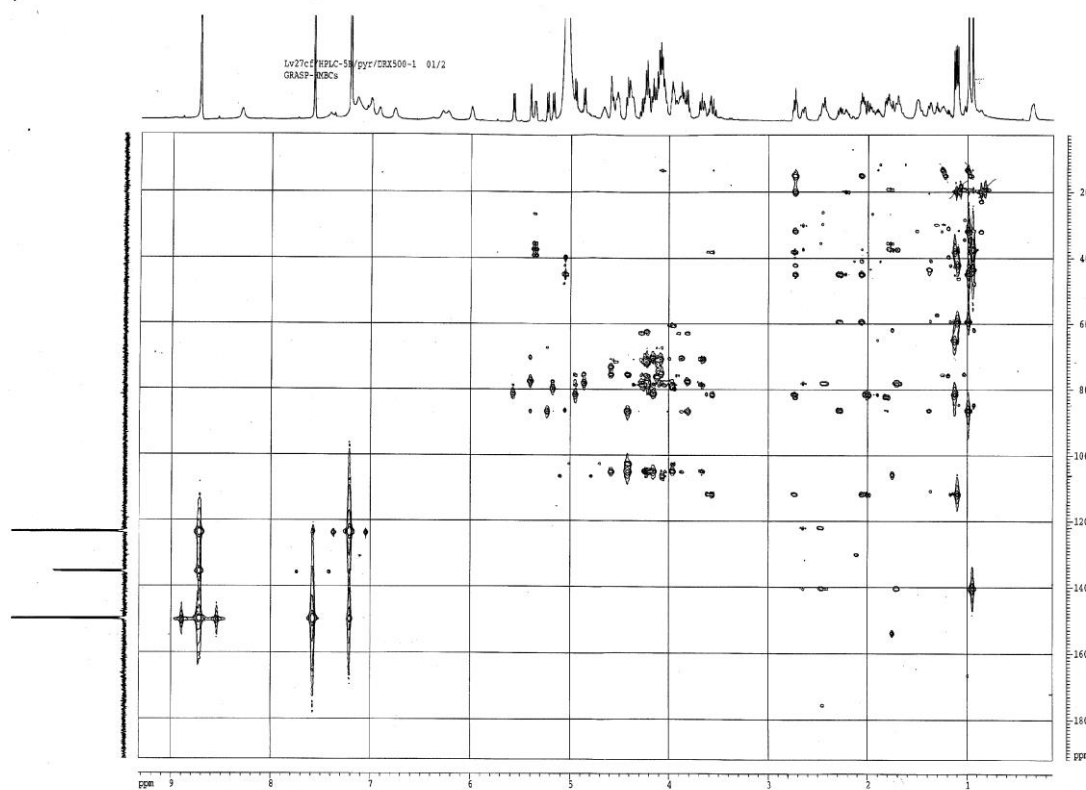

# Elemental Composition Report

Page 1

## Single Mass Analysis

Tolerance = 20.0 PPM / DBE: min = -1.5, max = 40.0

Element prediction: Off

Number of isotope peaks used for i-FIT = 3

Monoisotopic Mass, Even Electron Ions

84 formula(e) evaluated with 6 results within limits (all results (up to 1000) for each mass)

Elements Used:

C: 0-100 H: 0-100 O: 25-29 Na: 0-1

LV 27CF5B2

SHINODA001 72 (1.361) AM (Cen,4, 80.00, Ht,0.0,0.00,0.70); Sm (SG, 1x3.00); Cm (63:72)

1: TOF MS ES+  
2.20e+003

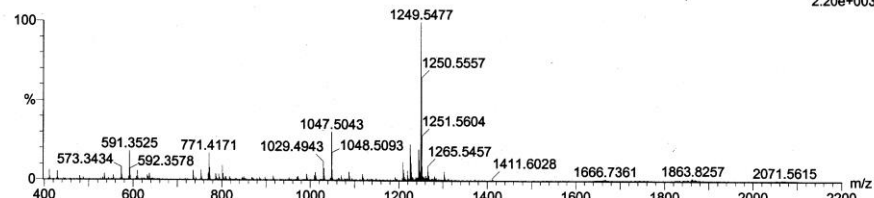

Minimum:

Maximum:

|           |            | 5.0   | 20.0  | -1.5 |       |                |
|-----------|------------|-------|-------|------|-------|----------------|
|           |            |       |       | 40.0 |       |                |
| Mass      | Calc. Mass | mDa   | PPM   | DBE  | i-FIT | Formula        |
| 1249.5477 | 1249.5490  | -1.3  | -1.0  | 14.5 | 0.5   | C58 H89 O29    |
|           | 1249.5465  | 1.2   | 1.0   | 11.5 | 1.0   | C56 H90 O29 Na |
|           | 1249.5618  | -14.1 | -11.3 | 15.5 | 2.7   | C60 H90 O26 Na |
|           | 1249.5254  | 22.3  | 17.8  | 16.5 | 5.6   | C59 H86 O27 Na |
|           | 1249.5642  | -16.5 | -13.2 | 18.5 | 5.7   | C62 H89 O26    |
|           | 1249.5278  | 19.9  | 15.9  | 19.5 | 6.6   | C61 H85 O27    |

Fig. 13.14.  $^1\text{H}$  and  $^{13}\text{C}$  NMR spectral for **10**

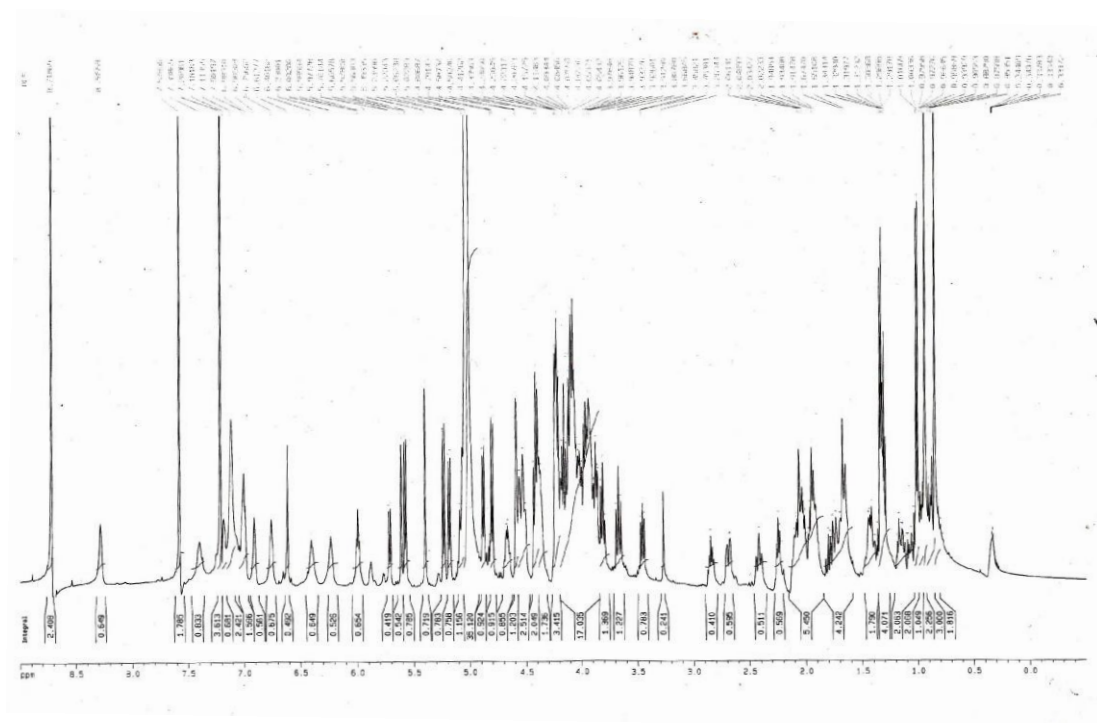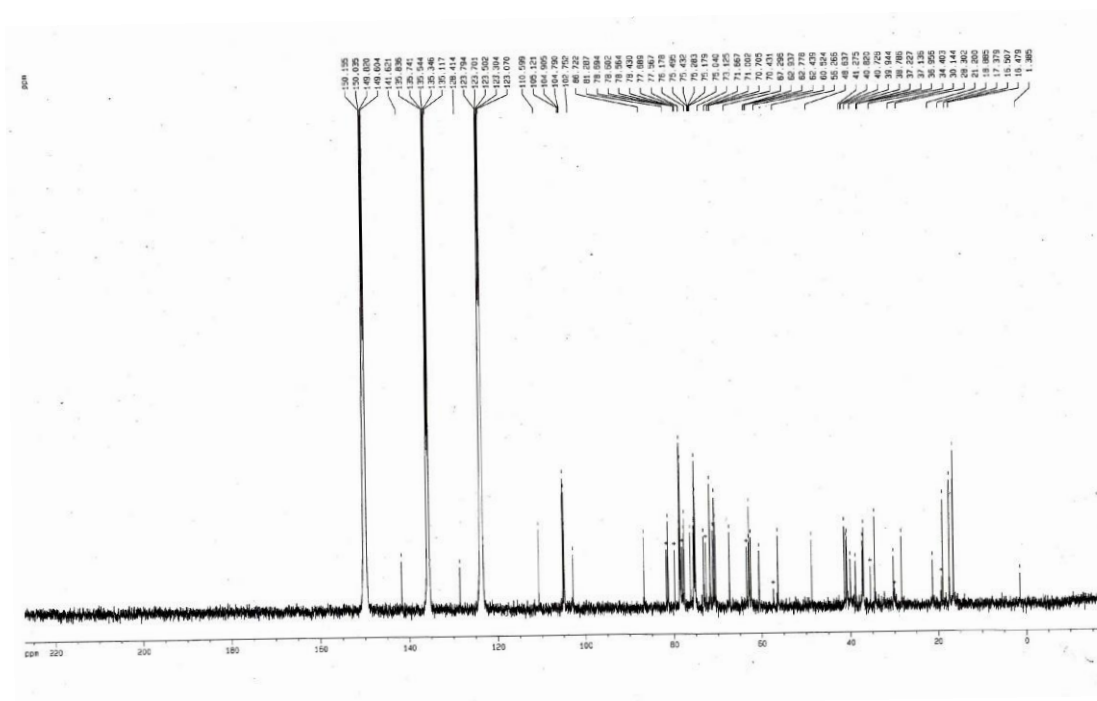



Fig. 15.16. HMBC and MS spectrometry for **10**

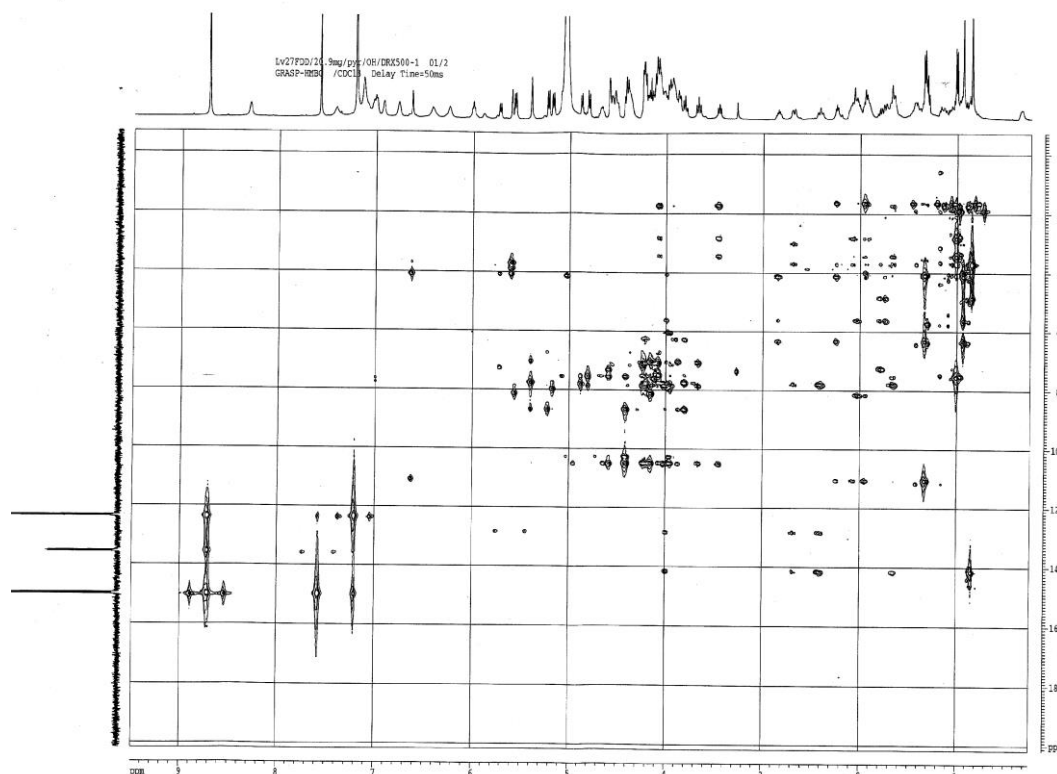

# Elemental Composition Report

Page 1

## Single Mass Analysis

Tolerance = 20.0 PPM / DBE: min = -1.5, max = 300.0

Element prediction: Off

Number of isotope peaks used for i-FIT = 3

Monoisotopic Mass, Even Electron Ions

10 formula(e) evaluated with 1 results within limits (up to 50 closest results for each mass)

Elements Used:

C: 1-300 H: 1-1000 O: 29-29 Na: 1-1

Lv27FDD2

M-11032 101 (2.115) AM2 (Ar,22000.0,0.00,0.00); ABS; Cm (98:112)

1: TOF MS ES+  
1.48e+007

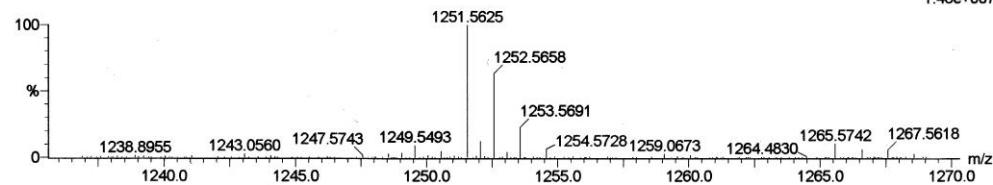

Minimum: -1.5  
Maximum: 100.0 20.0 300.0

| Mass      | Calc. Mass | mDa | PPM | DBE  | i-FIT | Norm | Conf (%) | Formula        |
|-----------|------------|-----|-----|------|-------|------|----------|----------------|
| 1251.5625 | 1251.5622  | 0.3 | 0.2 | 10.5 | 286.1 | n/a  | n/a      | C56 H92 O29 Na |

**Top Spectrum:  $^1\text{H}$  NMR in  $\text{CDCl}_3$**

Chemical shift range: 0.5 to 8.5 ppm. Integration values are provided below the baseline.

**Bottom Spectrum:  $^1\text{H}$  NMR in  $\text{DMSO}-d_6$**

Chemical shift range: 0 to 12 ppm. Integration values are provided below the baseline.

Fig. 19.20 HMBC and MS spectrometry for **11**

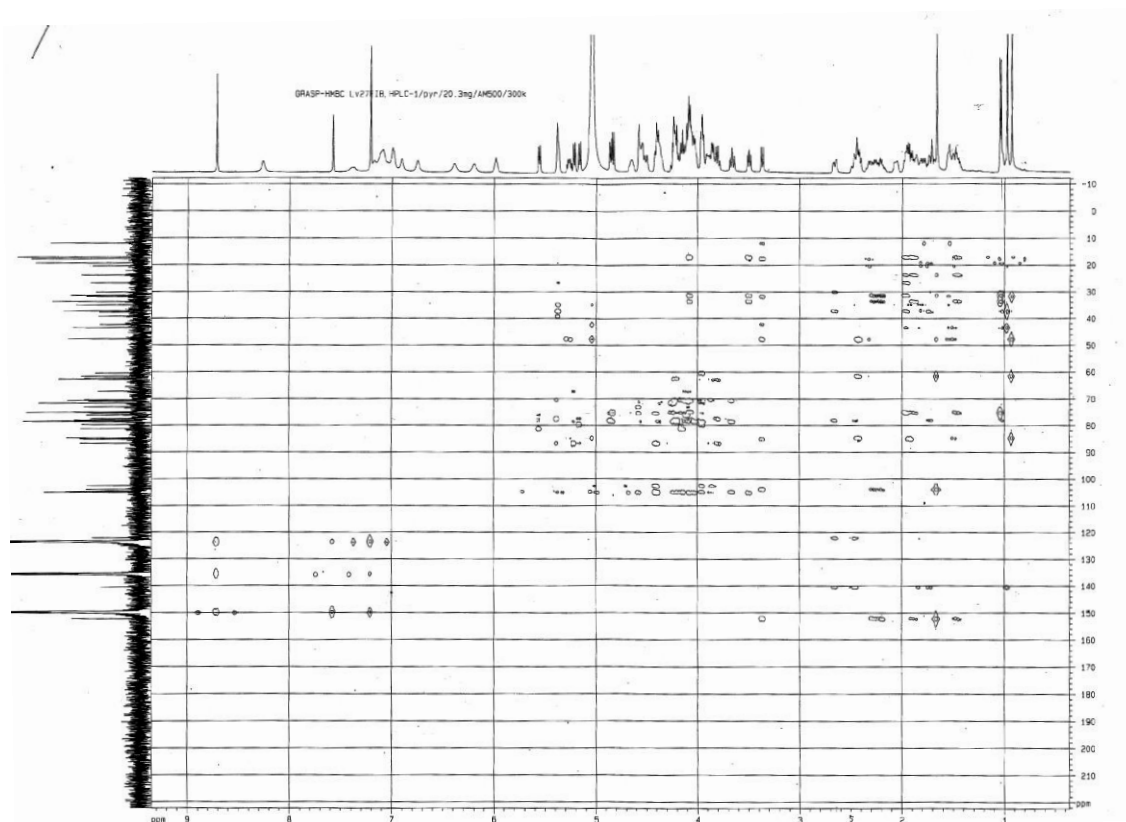

# Elemental Composition Report

Page 1

## Single Mass Analysis (displaying only valid results)

Tolerance = 6.0 PPM / DBE: min = -1.5, max = 40.0

Isotope cluster parameters: Separation = 1.0 Abundance = 1.0%

Monoisotopic Mass, Odd and Even Electron Ions

45 formula(e) evaluated with 2 results within limits (all results (up to 1000) for each mass)

LV27FIBH11 HPLC-1

SHINODA 002 23 (0.424) AM (Cen,3, 80.00, Ht,5000.0,0.00,0.80); Sm (SG, 2x3.00); Cm (3:24)

23-Oct-2009  
1: TOF MS ES+  
1233.5516 8.57e3

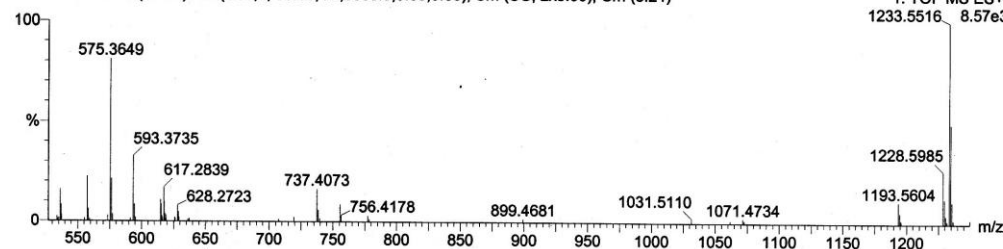

Minimum: 10.0 6.0 -1.5  
Maximum: 40.0

| Mass      | Calc. Mass | mDa  | PPM  | DBE  | Score | Formula        |
|-----------|------------|------|------|------|-------|----------------|
| 1233.5516 | 1233.5516  | 0.0  | 0.0  | 11.5 | 1     | C56 H90 O28 Na |
|           | 1233.5540  | -2.4 | -1.9 | 14.5 | 2     | C58 H89 O28    |

Fig. 21.22.  $^1\text{H}$  and  $^{13}\text{C}$  NMR spectral for **12**

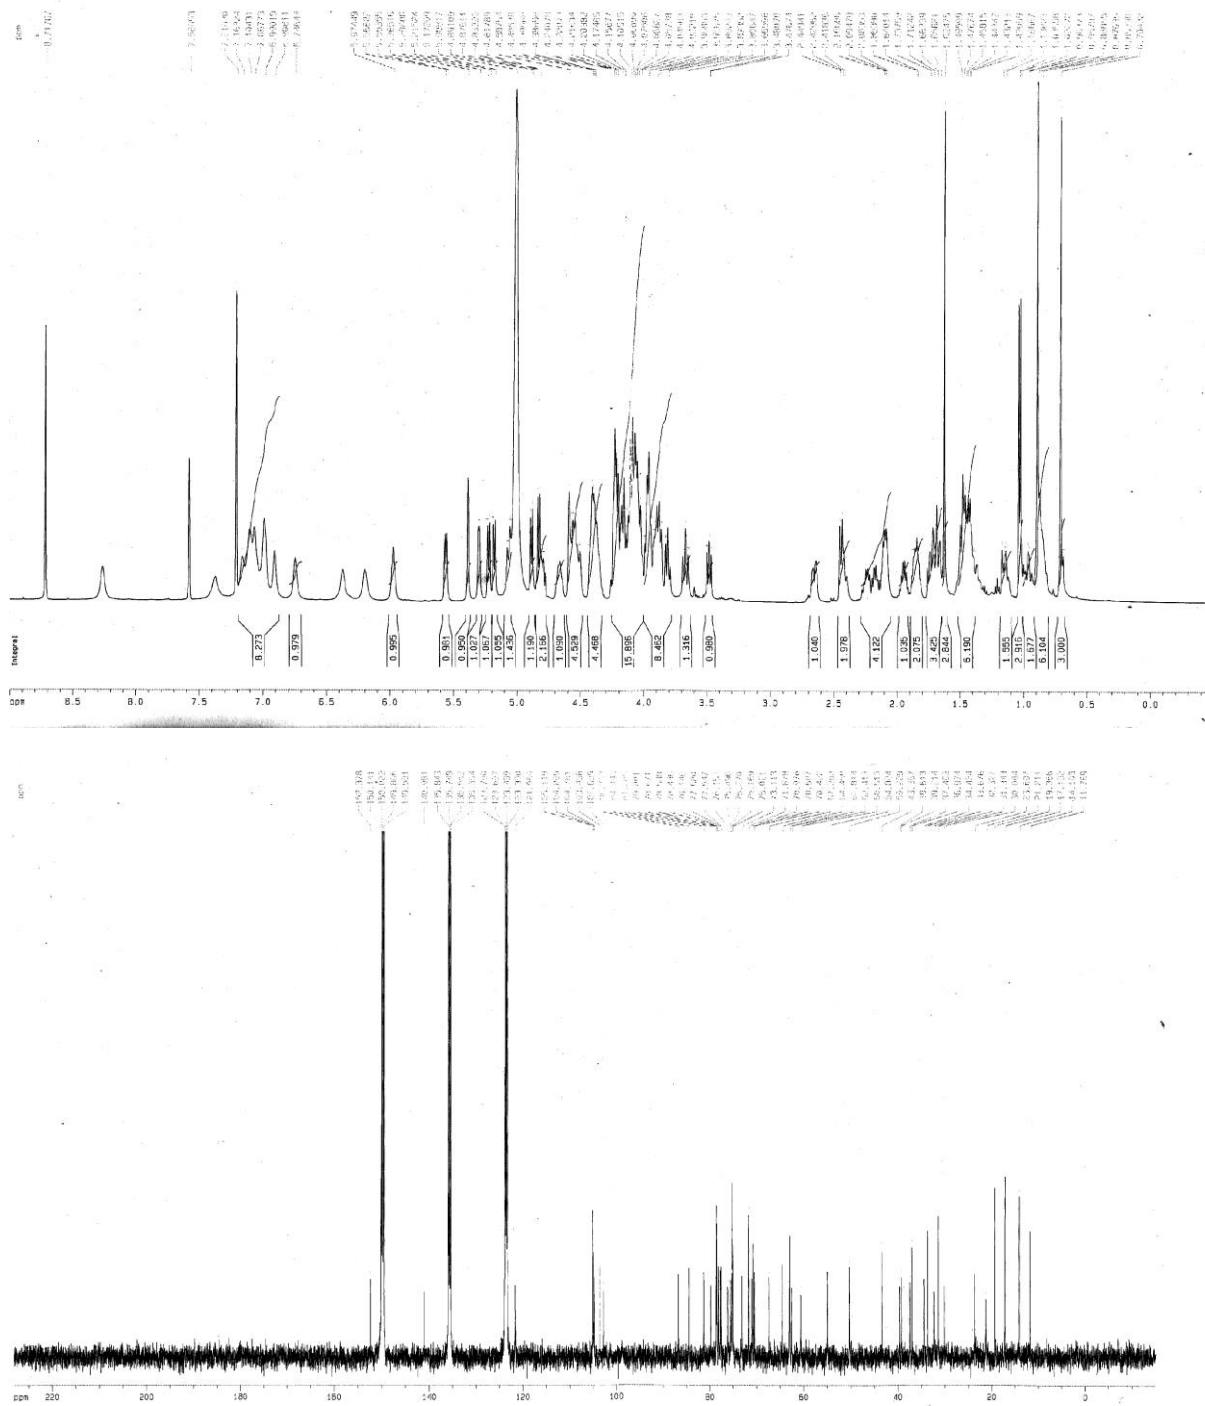

Fig. 23.24. HMBC and MS spectrometry for **12**

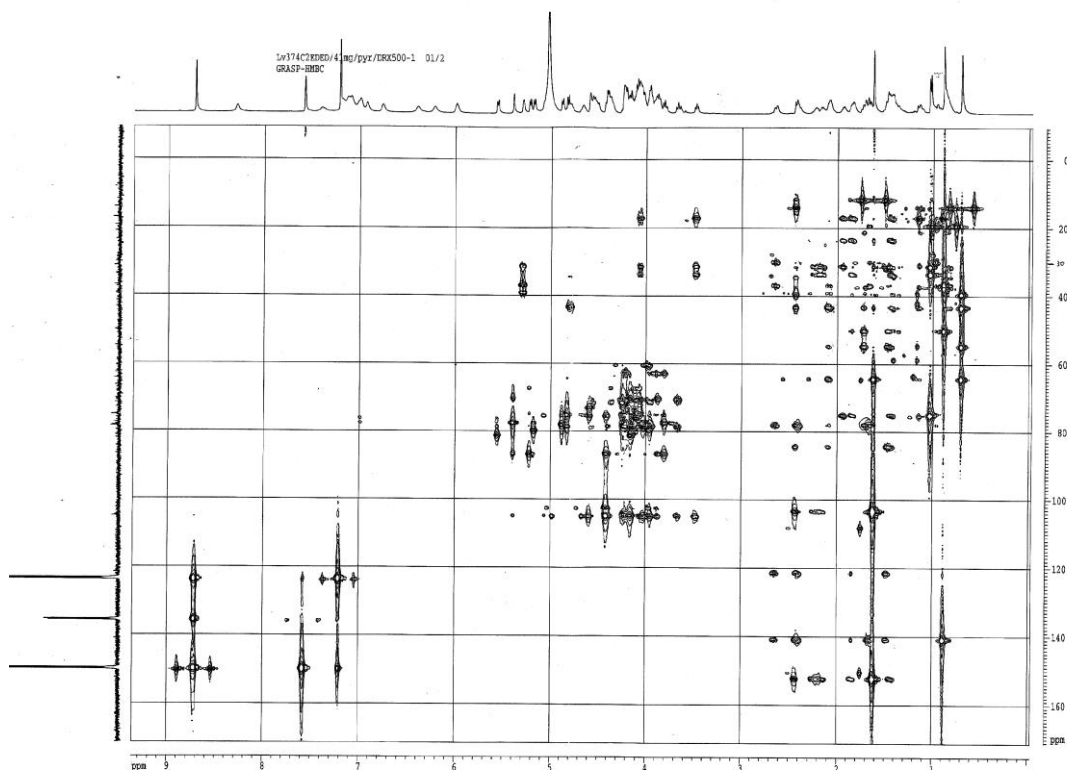

# Elemental Composition Report

Page 1

## Single Mass Analysis

Tolerance = 20.0 PPM / DBE: min = -1.5, max = 300.0

Element prediction: Off

Number of isotope peaks used for i-FIT = 3

Monoisotopic Mass, Even Electron Ions

10 formula(e) evaluated with 1 results within limits (up to 50 closest results for each mass)

Elements Used:

C: 1-300 H: 1-1000 O: 27-27

Lv374C2ED

M-11030 167 (3.483) AM2 (Ar,22000.0,0.00,0.00); ABS; Cm (156:170)

1: TOF MS ES+  
3.31e+007

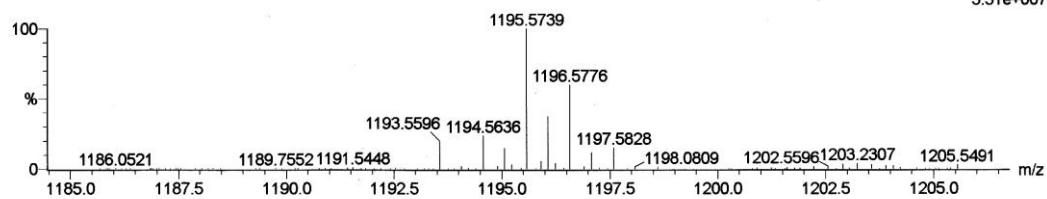

Minimum: -1.5  
Maximum: 100.0 20.0 300.0

| Mass      | Calc. Mass | mDa  | PPM  | DBE  | i-FIT | Norm | Conf(%) | Formula     |
|-----------|------------|------|------|------|-------|------|---------|-------------|
| 1195.5739 | 1195.5748  | -0.9 | -0.8 | 11.5 | 295.0 | n/a  | n/a     | C56 H91 O27 |

[illegible]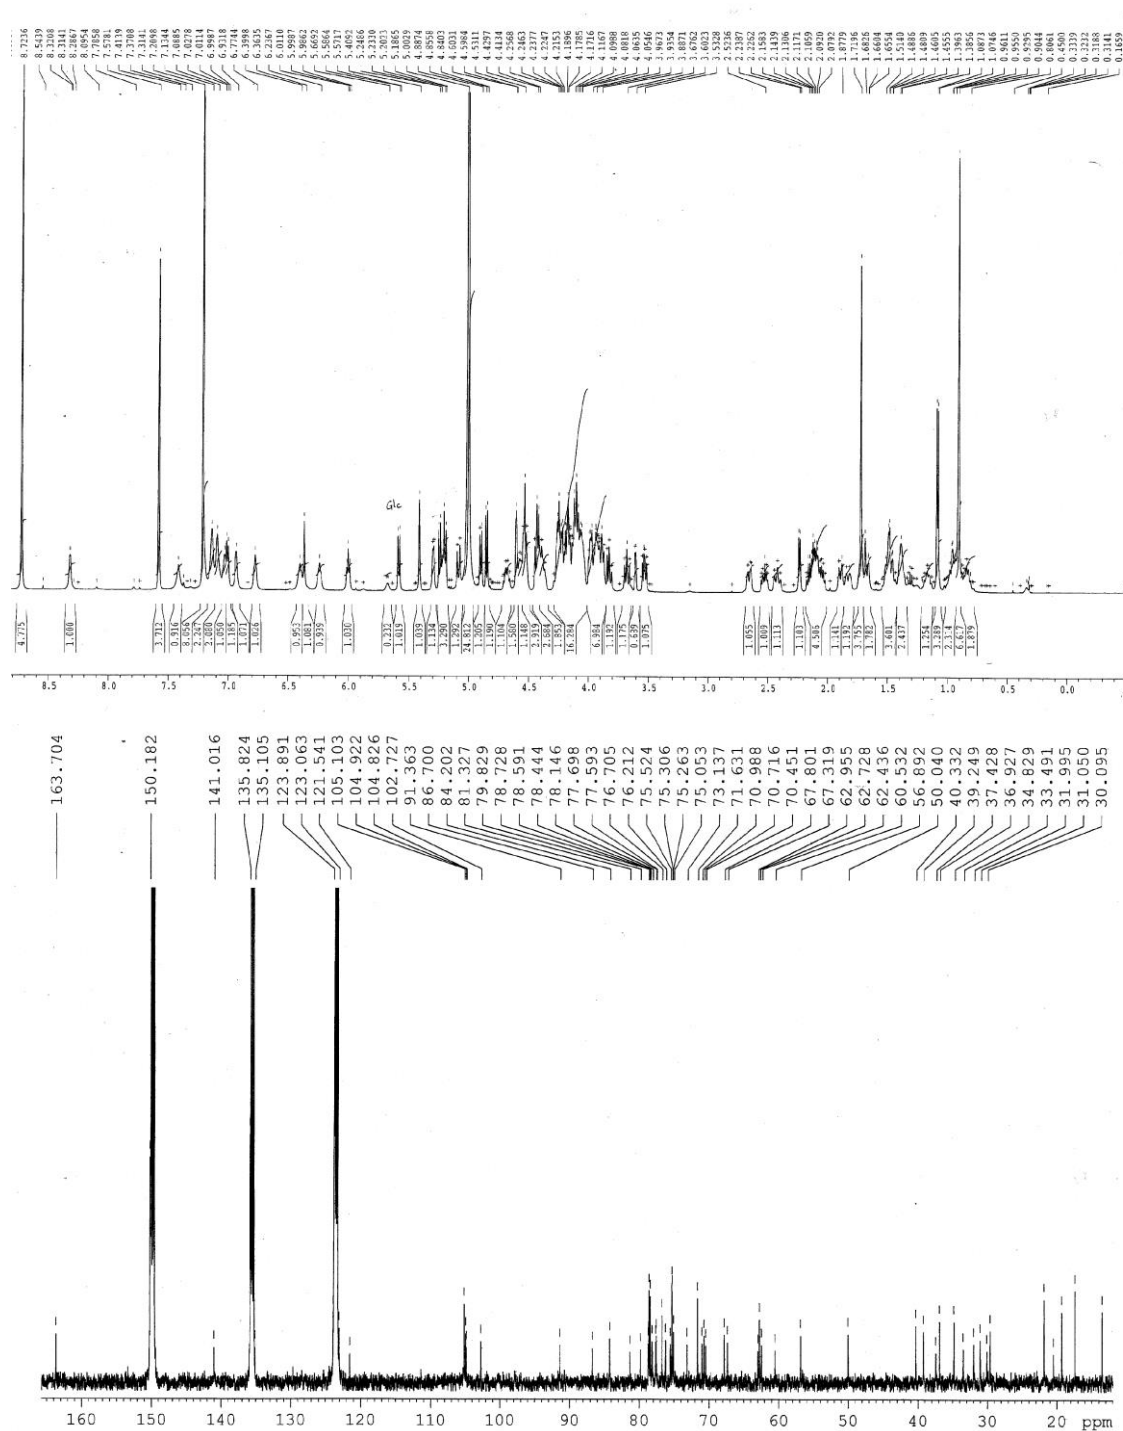

2D NMR spectrum of compound 1. The x-axis represents chemical shift in ppm (0 to 8), and the y-axis represents chemical shift in ppm (0 to 180). The 1D  $^1\text{H}$  NMR spectrum is shown at the top, and the 1D  $^{13}\text{C}$  NMR spectrum is shown on the left. The 2D spectrum displays correlations between the two dimensions. A label '1' is present near the bottom center of the 2D plot area.

## Page 1

1: TOF MS ES+  
6.32e+004  
1233.5531

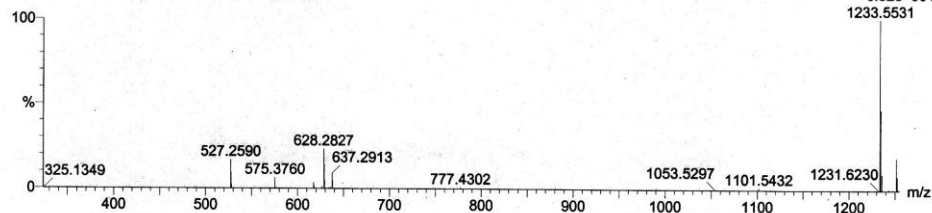

| Minimum:  |            |      |      | -1.5 |        |         |     |
|-----------|------------|------|------|------|--------|---------|-----|
| Maximum:  |            | 5.0  | 10.0 | 60.0 |        |         |     |
| Mass      | Calc. Mass | mDa  | PPM  | DBE  | i-FIT  | Formula |     |
| 1233.5531 | 1233.5540  | -0.9 | -0.7 | 14.5 | 6476.6 | C58 H89 | 028 |
|           | 1233.5516  | 1.5  | 1.2  | 11.5 | 5777.0 | C56 H90 | 028 |

Fig. 29.30.  $^1\text{H}$  and  $^{13}\text{C}$  NMR spectral for **13a**

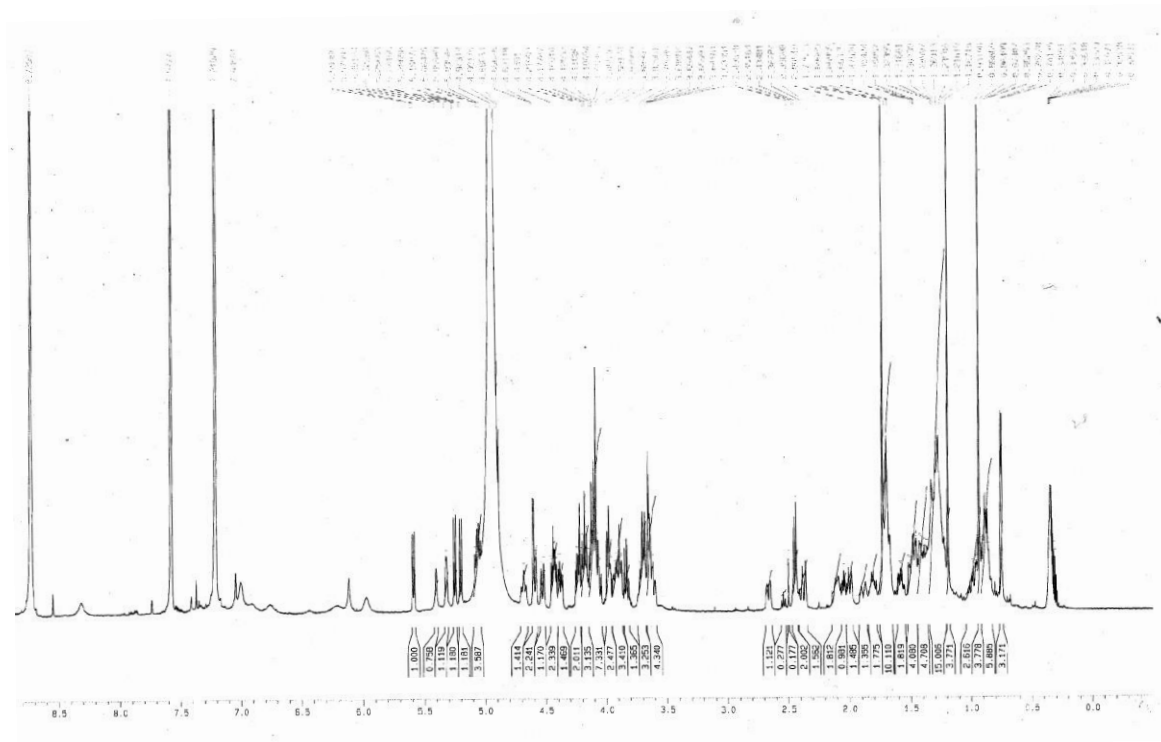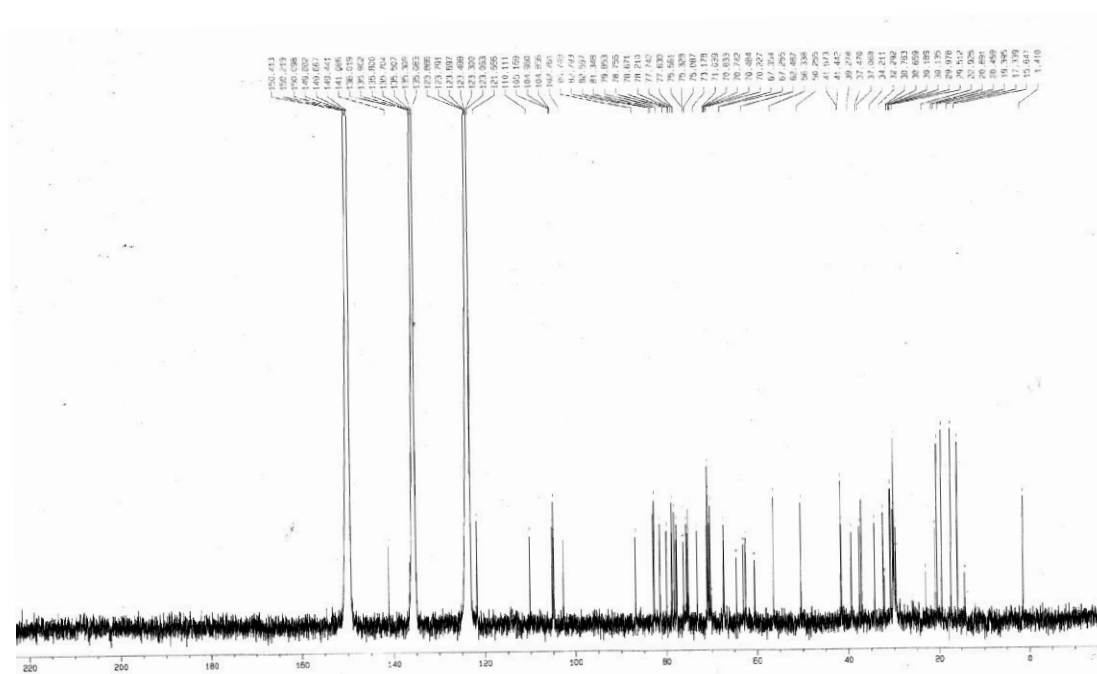



Fig. 31.32 HMBC and MS spectrometry for **13a**

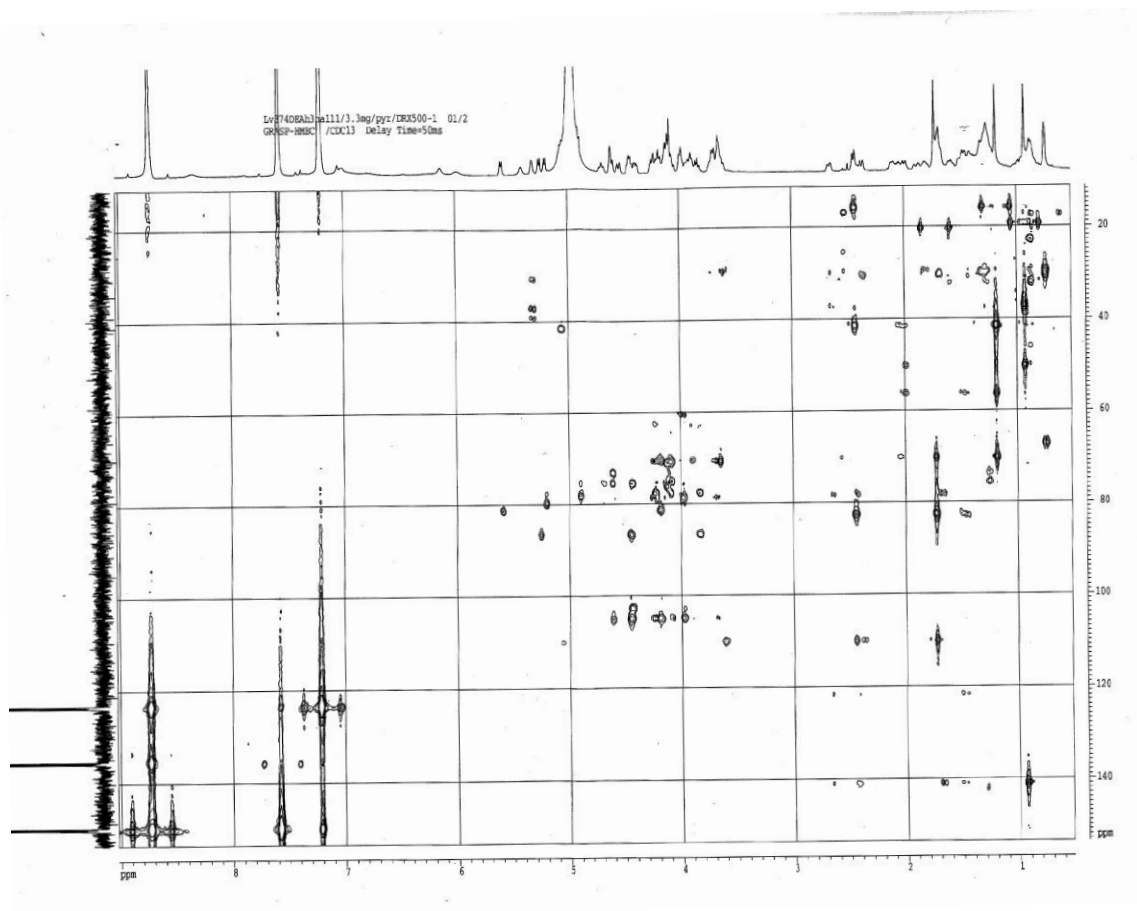

# Elemental Composition Report

Page 1

## Single Mass Analysis

Tolerance = 15.0 PPM / DBE: min = -1.5, max = 60.0

Element prediction: Off

Number of isotope peaks used for i-FIT = 3

Monoisotopic Mass, Even Electron Ions

53 formula(e) evaluated with 3 results within limits (all results (up to 1000) for each mass)

Elements Used:

C: 10-100 H: 10-100 O: 17-23 Na: 1-1

LV374111

SHINODA 001 207 (3.902) AM (Cen,4, 80.00, Ar,0.0,0.00,0.70); Sm (SG, 1x3.00); Cm (207:232)

1: TOF MS ES+  
5.37e+004

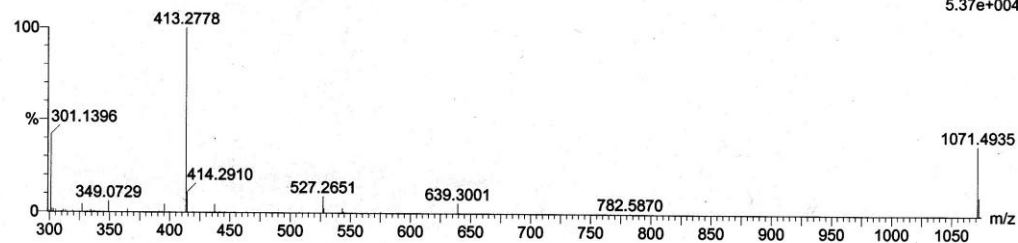

| Minimum:  |            |      |      | -1.5 |         |             |    |
|-----------|------------|------|------|------|---------|-------------|----|
| Maximum:  |            | 5.0  | 15.0 | 60.0 |         |             |    |
| Mass      | Calc. Mass | mDa  | PPM  | DBE  | i-FIT   | Formula     |    |
| 1071.4935 | 1071.4929  | 0.6  | 0.6  | 19.5 | 10172.7 | C57 H76 O18 | Na |
|           | 1071.4988  | -5.3 | -4.9 | 10.5 | 9722.1  | C50 H80 O23 | Na |
|           | 1071.4777  | 15.8 | 14.7 | 15.5 | 9939.4  | C53 H76 O21 | Na |

Fig. 33.34.  $^1\text{H}$  and  $^{13}\text{C}$  NMR spectral for **14**

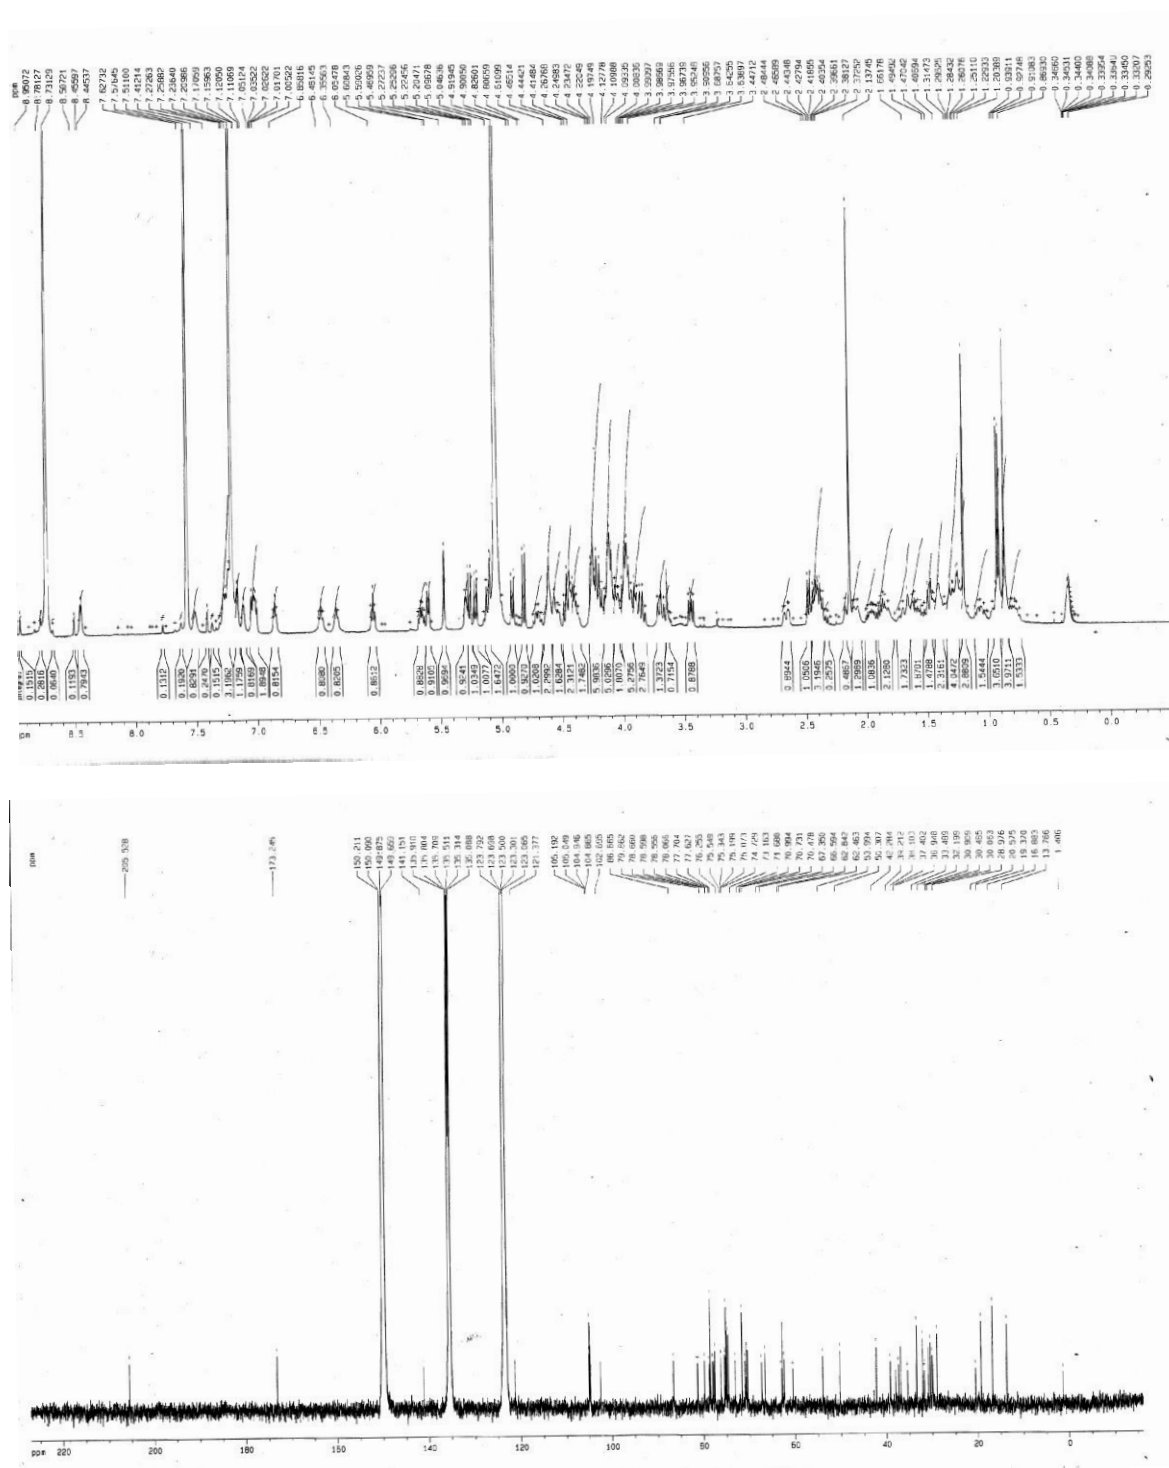

Fig. 35.36. HMBC and MS spectrometry for **14**

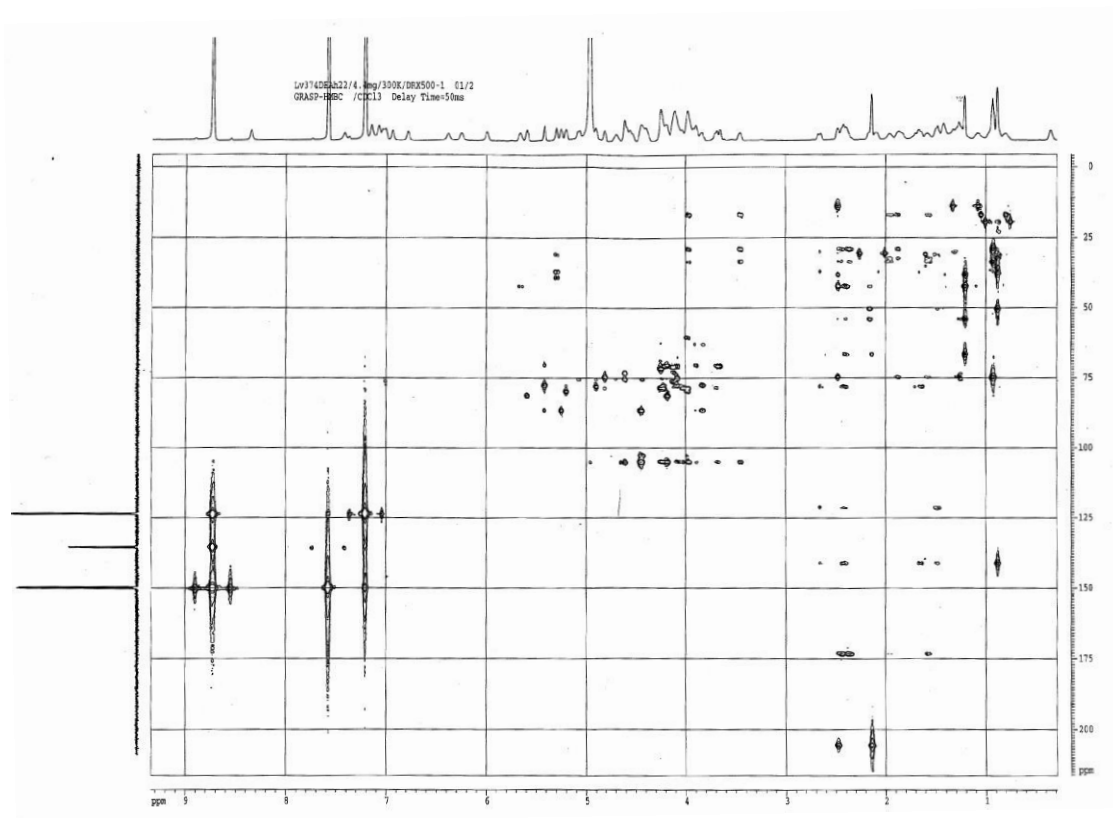

## Elemental Composition Report

Page 1

### Single Mass Analysis

Tolerance = 20.0 PPM / DBE: min = -1.5, max = 300.0

Element prediction: Off

Number of isotope peaks used for i-FIT = 3

Monoisotopic Mass, Even Electron Ions

10 formula(e) evaluated with 1 results within limits (up to 50 closest results for each mass)

Elements Used:

C: 1-300 H: 1-1000 O: 29-29 Na: 1-1

74DEAH22

M-11031 129 (2.691) AM2 (Ar,22000.0,0.00,0.00); ABS; Cm (115:129)

1: TOF MS ES+  
1.21e+007

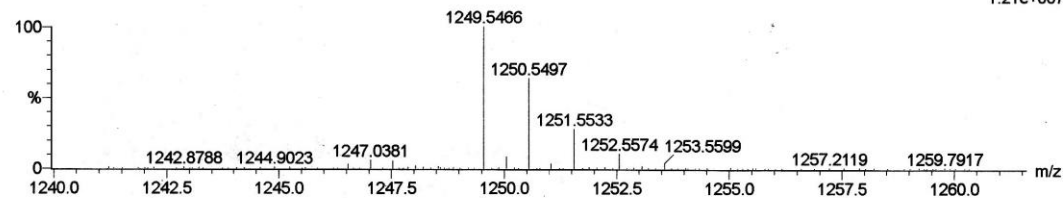

Minimum: -1.5  
Maximum: 300.0

| Mass      | Calc. Mass | mDa | PPM | DBE  | i-FIT | Norm | Conf (%) | Formula        |
|-----------|------------|-----|-----|------|-------|------|----------|----------------|
| 1249.5466 | 1249.5465  | 0.1 | 0.1 | 11.5 | 279.7 | n/a  | n/a      | C56 H90 O29 Na |

Fig. 37.38.  $^1\text{H}$  and  $^{13}\text{C}$  NMR spectral for **15**

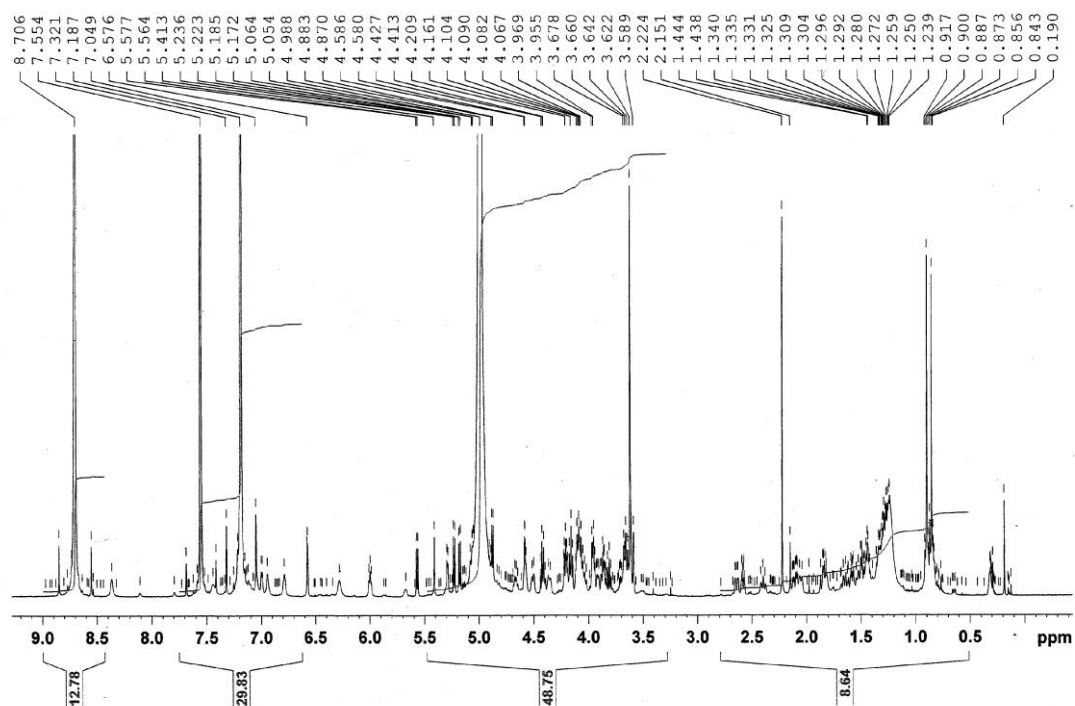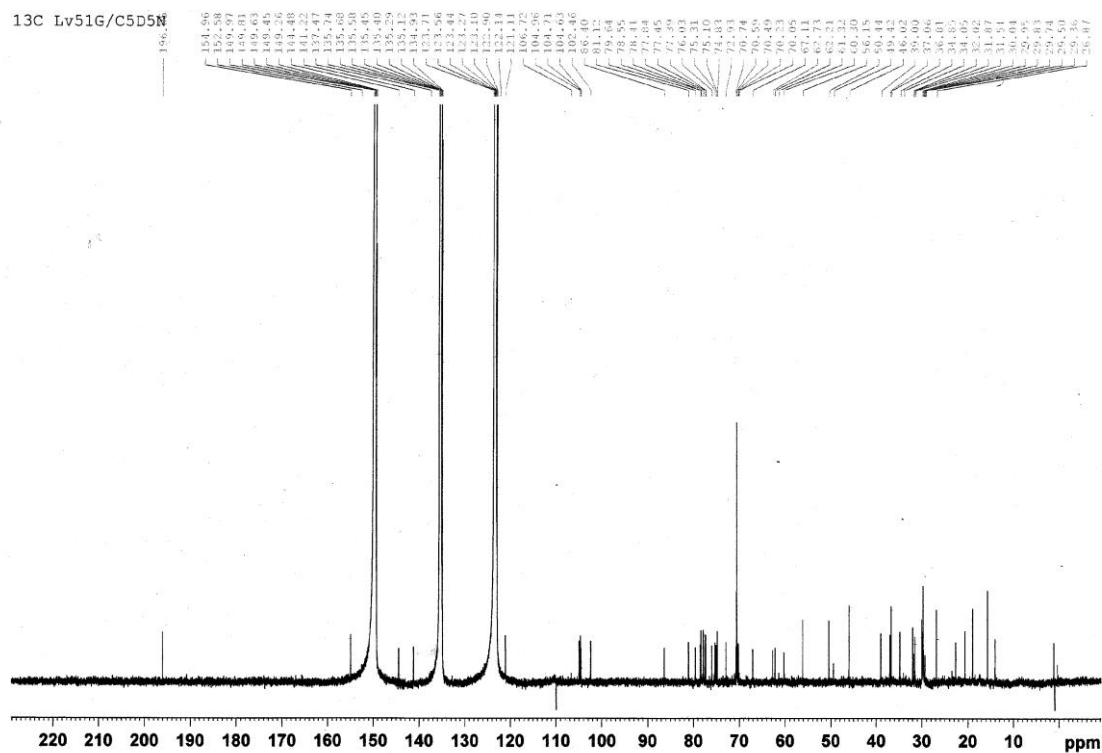

Fig. 39.40 HMBC and MS spectrometry for **15**

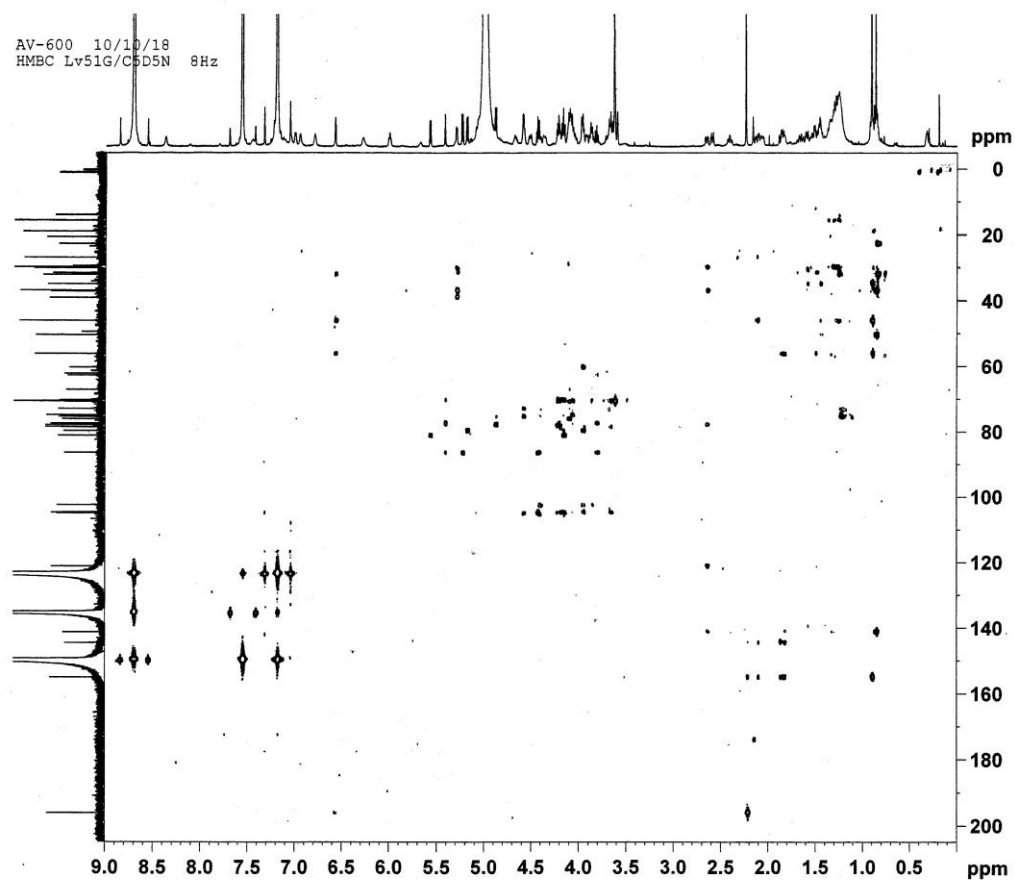

# Elemental Composition Report

Page 1

## Single Mass Analysis

Tolerance = 15.0 PPM / DBE: min = -1.5, max = 60.0

Element prediction: Off

Number of isotope peaks used for i-FIT = 3

Monoisotopic Mass, Even Electron Ions

15 formula(e) evaluated with 1 results within limits (all results (up to 1000) for each mass)

Elements Used:

C: 10-100 H: 10-100 O: 20-21 Na: 1-1

LV51G

SHINODA 001 57 (1.080) AM (Cen,4, 80.00, Ar,0.0,0.00,0.70); Sm (SG, 1x3.00); Cm (54:71)

1: TOF MS ES+  
1.13e+005

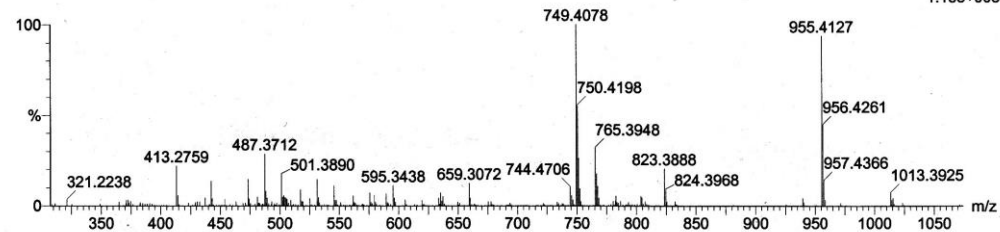

Minimum: 5.0 15.0 -1.5  
Maximum: 60.0

| Mass     | Calc. Mass | mDa  | PPM  | DBE  | i-FIT | Formula        |
|----------|------------|------|------|------|-------|----------------|
| 955.4127 | 955.4151   | -2.4 | -2.5 | 10.5 | 160.2 | C44 H68 O21 Na |

Fig.41. Toxicity curves of **1** and **8**.

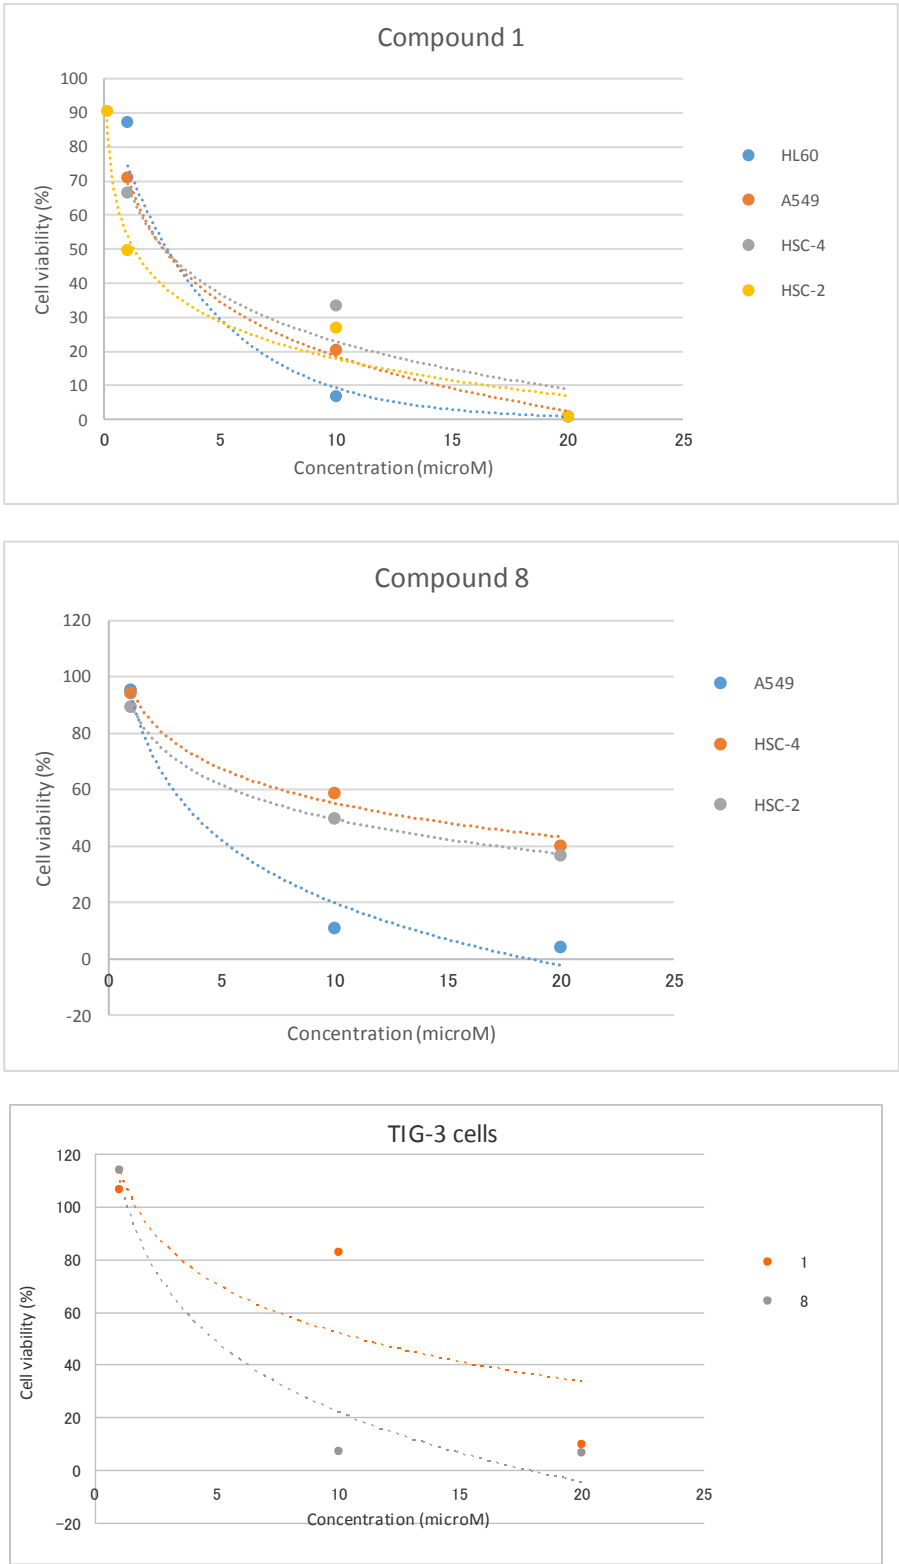

Supplement: s1 [file s1]
