# Supplementary material for: Steroidal Glycosides from Convallaria majalis Whole Plants and Their Cytotoxic Activity
Source: MDPI journal article supplement (doi:10.3390/ijms18112358), 2017-11-07
Supplement: s1 [file s1]

# Steroidal glycosides from *Convallaria majalis* whole plants and Their Cytotoxic Activity

Yukiko Matsuo, Daisuke Shinoda, Aina Nakamaru, Kuni Kamohara, Hiroshi Sakagami, and Yoshihiro Mimaki

## Supplementary Materials

Table 1. NMR spectral assignments for **1**, **2** and **3**

Table 2. NMR spectral assignments for **7**, **8** and **9**

Table 3. NMR spectral assignments for **4**

Table 4. NMR spectral assignments for **5**

Table 5. NMR spectral assignments for **6**

Table 6. NMR spectral assignments for **10**

Table 7. NMR spectral assignments for **10a**

Table 8. NMR spectral assignments for **11**

Table 9. NMR spectral assignments for **12**

Table 10. NMR spectral assignments for **13**

Table 11. NMR spectral assignments for **13a**

Table 12. NMR spectral assignments for **14**

Table 13. NMR spectral assignments for **15**

Fig. 1-4 Morphological observations by fluorescence microscopy after DAPI staining.

**Table 1.**  $^{13}\text{C}$ -NMR (125 MHz,  $\text{C}_5\text{D}_5\text{N}$ ) spectral assignments for **1**, **2**, and **3**

| Position | <b>1</b> | <b>2</b> | Position  | <b>1</b> | <b>2</b> | Position | <b>3</b> | Position | <b>3</b> |
|----------|----------|----------|-----------|----------|----------|----------|----------|----------|----------|
| 1        | 37.4     | 37.6     | Gal 1'    | 102.7    | 102.7    | 1        | 37.4     | Glc 1'   | 102.5    |
| 2        | 30.1     | 30.2     | 2'        | 73.2     | 73.2     | 2        | 30.0     | 2'       | 75.6     |
| 3        | 78.2     | 78.2     | 3'        | 75.6     | 75.5     | 3        | 78.2     | 3'       | 76.7     |
| 4        | 39.2     | 39.9     | 4'        | 79.9     | 79.9     | 4        | 39.3     | 4'       | 78.3     |
| 5        | 141.0    | 140.5    | 5'        | 75.3     | 75.3     | 5        | 140.9    | 5'       | 77.2     |
| 6        | 121.6    | 122.2    | 6'        | 60.5     | 60.5     | 6        | 121.7    | 6'       | 62.6     |
| 7        | 32.1     | 26.5     |           |          |          | 7        | 32.2     |          |          |
| 8        | 31.6     | 35.6     | Glc 1''   | 105.2    | 105.1    | 8        | 31.7     | Rha 1''  | 102.7    |
| 9        | 50.2     | 43.6     | 2''       | 81.3     | 81.3     | 9        | 50.3     | 2''      | 72.7     |
| 10       | 37.0     | 37.4     | 3''       | 86.7     | 86.8     | 10       | 37.1     | 3''      | 72.9     |
| 11       | 21.0     | 20.4     | 4''       | 70.5     | 70.5     | 11       | 21.1     | 4''      | 74.0     |
| 12       | 39.8     | 31.9     | 5''       | 77.6     | 77.6     | 12       | 39.9     | 5''      | 70.4     |
| 13       | 40.4     | 45.1     | 6''       | 63.0     | 63.0     | 13       | 40.5     | 6''      | 18.6     |
| 14       | 56.5     | 86.4     |           |          |          | 14       | 56.7     |          |          |
| 15       | 32.2     | 39.2     | Glc' 1''' | 104.9    | 104.9    | 15       | 32.2     |          |          |
| 16       | 81.1     | 82.0     | 2'''      | 76.2     | 76.2     | 16       | 81.1     |          |          |
| 17       | 62.7     | 59.7     | 3'''      | 77.7     | 77.7     | 17       | 62.9     |          |          |
| 18       | 16.3     | 20.0     | 4'''      | 71.0     | 71.0     | 18       | 16.4     |          |          |
| 19       | 19.4     | 19.3     | 5'''      | 78.7     | 78.7     | 19       | 19.4     |          |          |
| 20       | 42.4     | 42.5     | 6'''      | 62.7     | 62.4     | 20       | 42.0     |          |          |
| 21       | 14.9     | 15.2     |           |          |          | 21       | 15.0     |          |          |
| 22       | 109.7    | 110.0    | Xyl 1'''' | 104.8    | 104.8    | 22       | 109.3    |          |          |
| 23       | 26.3     | 26.6     | 2''''     | 75.1     | 75.1     | 23       | 31.8     |          |          |
| 24       | 26.1     | 26.2     | 3''''     | 78.7     | 78.6     | 24       | 29.3     |          |          |
| 25       | 27.5     | 27.6     | 4''''     | 70.7     | 70.7     | 25       | 30.6     |          |          |
| 26       | 65.0     | 65.1     | 5''''     | 67.3     | 67.3     | 26       | 66.9     |          |          |
| 27       | 16.3     | 16.3     |           |          |          | 27       | 17.3     |          |          |

**Table 2.** <sup>13</sup>C-NMR (125 MHz, C<sub>5</sub>D<sub>5</sub>N) spectral assignments for **7**, **8**, and **9**.

| Position | 7     | Position | Position | 8  | 9     | Position | 8           | 9     |       |
|----------|-------|----------|----------|----|-------|----------|-------------|-------|-------|
| 1        | 37.7  | Glc 1'   | 105.1    | 1  | 37.5  | 37.7     | Gal 1'      | 102.7 | 102.6 |
| 2        | 32.6  | 2'       | 75.2     | 2  | 30.0  | 30.1     | 2'          | 73.1  | 73.1  |
| 3        | 71.3  | 3'       | 78.6     | 3  | 78.2  | 78.2     | 3'          | 75.5  | 75.5  |
| 4        | 43.4  | 4'       | 71.7     | 4  | 39.2  | 39.2     | 4'          | 79.8  | 79.8  |
| 5        | 142.0 | 5'       | 78.5     | 5  | 141.0 | 140.5    | 5'          | 75.2  | 75.2  |
| 6        | 121.1 | 6'       | 62.8     | 6  | 121.6 | 122.2    | 6'          | 60.5  | 60.5  |
| 7        | 32.3  |          |          | 7  | 32.3  | 26.7     |             |       |       |
| 8        | 31.7  |          |          | 8  | 31.6  | 35.0     | Glc 1"      | 105.1 | 105.1 |
| 9        | 50.4  |          |          | 9  | 50.3  | 43.6     | 2"          | 81.3  | 81.3  |
| 10       | 37.0  |          |          | 10 | 37.1  | 37.3     | 3"          | 86.7  | 86.8  |
| 11       | 21.2  |          |          | 11 | 21.1  | 20.4     | 4"          | 70.5  | 70.4  |
| 12       | 40.0  |          |          | 12 | 39.9  | 32.0     | 5"          | 77.6  | 77.6  |
| 13       | 40.8  |          |          | 13 | 40.8  | 45.4     | 6"          | 62.8  | 62.9  |
| 14       | 56.7  |          |          | 14 | 56.6  | 86.3     |             |       |       |
| 15       | 32.5  |          |          | 15 | 32.4  | 40.0     | Glc' 1'''   | 104.8 | 104.8 |
| 16       | 81.1  |          |          | 16 | 81.3  | 81.7     | 2'''        | 76.2  | 76.2  |
| 17       | 63.8  |          |          | 17 | 63.8  | 60.5     | 3'''        | 77.7  | 77.7  |
| 18       | 16.5  |          |          | 18 | 16.4  | 20.1     | 4'''        | 71.0  | 71.0  |
| 19       | 19.5  |          |          | 19 | 19.4  | 19.3     | 5'''        | 78.6  | 78.5  |
| 20       | 40.6  |          |          | 20 | 40.7  | 40.8     | 6'''        | 62.5  | 62.4  |
| 21       | 16.4  |          |          | 21 | 16.4  | 16.7     |             |       |       |
| 22       | 110.7 |          |          | 22 | 110.7 | 113.0    | Xyl 1''''   | 104.9 | 104.9 |
| 23       | 37.1  |          |          | 23 | 37.0  | 37.1     | 2''''       | 75.1  | 75.2  |
| 24       | 28.3  |          |          | 24 | 28.3  | 28.3     | 3''''       | 78.7  | 78.7  |
| 25       | 34.4  |          |          | 25 | 34.4  | 34.4     | 4''''       | 70.7  | 70.7  |
| 26       | 75.3  |          |          | 26 | 75.4  | 75.4     | 5''''       | 67.3  | 67.3  |
| 27       | 17.4  |          |          | 27 | 17.4  | 17.4     |             |       |       |
|          |       |          |          |    |       |          | Glc'' 1'''' | 105.1 | 105.1 |
|          |       |          |          |    |       |          | 2''''       | 75.2  | 75.2  |
|          |       |          |          |    |       |          | 3''''       | 78.5  | 78.4  |
|          |       |          |          |    |       |          | 4''''       | 71.7  | 71.7  |
|          |       |          |          |    |       |          | 5''''       | 78.4  | 78.4  |
|          |       |          |          |    |       |          | 6''''       | 62.8  | 62.8  |

**Table 3.**  $^1\text{H}$ - and  $^{13}\text{C}$ -NMR (500 and 125 MHz,  $\text{C}_5\text{D}_5\text{N}$ ) spectral assignments for **4**

| Position | $\delta_{\text{H}}$ | $J$ (Hz)         | $\delta_{\text{C}}$ | Position  | $\delta_{\text{H}}$ | $J$ (Hz)      | $\delta_{\text{C}}$ |
|----------|---------------------|------------------|---------------------|-----------|---------------------|---------------|---------------------|
| 1 ax     | 0.98 m              |                  | 36.3                | Gal 1'    | 4.83 d              | 7.6           | 102.8               |
| eq       | 1.69 br d           | 12.9             |                     | 2'        | 4.40 dd             | 8.5, 7.6      | 73.1                |
| 2 ax     | 1.70 m              |                  | 30.1                | 3'        | 4.10 m              |               | 75.5                |
| eq       | 2.09 br dd          | 15.5, 5.5        |                     | 4'        | 4.59 br s           |               | 79.8                |
| 3        | 3.86 m              | $W_{1/2} = 27.4$ | 78.1                | 5'        | 3.98 m              |               | 75.4                |
| 4 ax     | 2.44 t              | 12.2             | 38.9                | 6' a      | 4.68 dd             | 15.1, 9.4     | 60.6                |
| eq       | 2.71 br d           | 12.2             |                     | b         | 4.21 br d           | 15.1          |                     |
| 5        | -                   |                  | 166.6               |           |                     |               |                     |
| 6        | 5.75 s              |                  | 126.9               | Glc 1"    | 5.19 d              | 7.5           | 105.2               |
| 7        | -                   |                  | 200.6               | 2"        | 4.44 dd             | 8.8, 7.5      | 81.3                |
| 8        | 2.74 d              | 13.1             | 49.5                | 3"        | 4.12 dd             | 8.8, 8.8      | 86.7                |
| 9        | 2.41 m              |                  | 44.4                | 4"        | 3.83 dd             | 9.5, 8.8      | 70.5                |
| 10       | -                   |                  | 38.5                | 5"        | 3.88 m              | 9.5, 5.6, 2.5 | 77.6                |
| 11 (2H)  | 1.54 m              |                  | 20.5                | 6" a      | 4.53 dd             | 11.4, 5.6     | 63.0                |
| 12 ax    | 1.41 m              |                  | 31.4                | b         | 4.02 dd             | 11.4, 2.5     |                     |
| eq       | 2.21 m              |                  |                     |           |                     |               |                     |
| 13       | -                   |                  | 45.9                | Glc' 1''' | 5.59 d              | 7.5           | 105.0               |
| 14       | -                   |                  | 84.6                | 2'''      | 4.09 dd             | 8.8, 7.5      | 76.2                |
| 15 a     | 3.48 m              |                  | 41.9                | 3'''      | 4.11 dd             | 8.8, 8.8      | 77.8                |
| b        | 2.21 m              |                  |                     | 4'''      | 4.22 dd             | 8.8, 8.8      | 71.7                |
| 16       | 5.06 dd             | 12.7, 9.0        | 82.2                | 5'''      | 3.96 m              |               | 78.7                |
| 17       | 2.72 t              | 8.3              | 58.3                | 6''' a    | 4.60 br d           | 11.9          | 62.6                |
| 18       | 1.04 s              |                  | 20.4                | b         | 4.38 br d           | 11.9          |                     |
| 19       | 0.99 s              |                  | 17.1                |           |                     |               |                     |
| 20       | 2.02 t              | 6.7              | 42.5                | Xyl 1'''' | 5.25 d              | 7.6           | 104.9               |
| 21       | 1.21 d              | 7.0              | 15.2                | 2''''     | 3.97 dd             | 8.0, 7.6      | 75.1                |
| 22       | -                   |                  | 110.0               | 3''''     | 4.08 dd             | 8.6, 8.0      | 78.8                |
| 23 ax    | 1.93 ddd            | 13.7, 13.7, 4.7  | 26.6                | 4''''     | 4.11 m              |               | 70.7                |
| eq       | 1.47 br dd          | 13.7, 3.6        |                     | 5'''' a   | 4.24 dd             | 10.7, 4.9     | 67.4                |
| 24 ax    | 2.12 br dd          | 13.7, 12.3       | 26.2                | b         | 3.68 dd             | 10.7, 10.4    |                     |
| eq       | 1.34 br d           | 12.3             |                     |           |                     |               |                     |
| 25       | 1.55 m              |                  | 27.5                |           |                     |               |                     |
| 26 ax    | 4.02 dd             | 10.9, 2.5        | 65.0                |           |                     |               |                     |
| eq       | 3.31 br d           | 10.9             |                     |           |                     |               |                     |
| 27       | 1.07 d              | 7.0              | 16.3                |           |                     |               |                     |

**Table 4.**  $^1\text{H}$ - and  $^{13}\text{C}$ -NMR (500 and 125 MHz,  $\text{C}_5\text{D}_5\text{N}$ ) spectral assignments for **5**

| Position | $\delta_{\text{H}}$ | $J$ (Hz)         | $\delta_{\text{C}}$ | Position    | $\delta_{\text{H}}$ | $J$ (Hz)   | $\delta_{\text{C}}$ |
|----------|---------------------|------------------|---------------------|-------------|---------------------|------------|---------------------|
| 1 ax     | 1.01 m              |                  | 37.6                | Gal 1'      | 4.86 d              | 7.5        | 102.7               |
| eq       | 1.72 br d           | 11.6             |                     | 2'          | 4.41 dd             | 8.5, 7.5   | 73.2                |
| 2 ax     | 1.69 t              | 12.9             | 30.1                | 3'          | 4.08 m              |            | 75.5                |
| eq       | 2.06 m              |                  |                     | 4'          | 4.58 br s           |            | 79.8                |
| 3        | 3.88 m              | $W_{1/2} = 23.3$ | 78.2                | 5'          | 3.96 m              |            | 75.3                |
| 4 ax     | 2.44 dd             | 11.5, 10.5       | 39.2                | 6' a        | 4.66 dd             | 13.5, 9.4  | 60.5                |
| eq       | 2.65 dd             | 11.5, 3.2        |                     | b           | 4.16 m              |            |                     |
| 5        | -                   |                  | 140.5               |             |                     |            |                     |
| 6        | 5.37 br s           |                  | 122.2               | Glc 1''     | 5.17 d              | 7.9        | 105.1               |
| 7 ax     | 2.48 m              |                  | 26.6                | 2''         | 4.40 dd             | 8.5, 7.9   | 81.3                |
| eq       | 1.84 br d           | 6.6              |                     | 3''         | 4.16 dd             | 8.8, 8.5   | 86.7                |
| 8        | 2.02 m              |                  | 35.5                | 4''         | 3.80 dd             | 9.4, 8.8   | 70.4                |
| 9        | 1.78 m              |                  | 43.5                | 5''         | 3.87 m              |            | 77.6                |
| 10       | -                   |                  | 37.3                | 6'' a       | 4.50 br d           | 11.8       | 62.9                |
| 11 (2H)  | 1.51 m              |                  | 20.3                | b           | 4.03 br d           | 11.8       |                     |
| 12 ax    | 1.41 br d           | 12.1             | 31.8                |             |                     |            |                     |
| eq       | 2.24 m              |                  |                     | Glc' 1'''   | 5.57 d              | 7.5        | 104.8               |
| 13       | -                   |                  | 44.9                | 2'''        | 4.06 dd             | 8.8, 7.5   | 76.2                |
| 14       | -                   |                  | 86.3                | 3'''        | 4.08 dd             | 9.0, 8.8   | 77.7                |
| 15 a     | 2.28 br d           | 7.6              | 39.6                | 4'''        | 4.22 dd             | 9.0, 9.0   | 71.0                |
| b        | 1.78 m              |                  |                     | 5'''        | 3.96 m              |            | 78.6                |
| 16       | 5.21 m              |                  | 82.3                | 6''' a      | 4.57 br d           | 10.8       | 62.4                |
| 17       | 2.73 t              | 7.3              | 59.2                | b           | 4.38 br d           | 10.8       |                     |
| 18       | 1.00 s              |                  | 19.9                |             |                     |            |                     |
| 19       | 0.96 s              |                  | 19.2                | Xyl 1''''   | 5.23 d              | 7.8        | 104.9               |
| 20       | 2.07 m              |                  | 42.4                | 2''''       | 3.96 dd             | 8.2, 7.8   | 75.0                |
| 21       | 1.14 d              | 6.8              | 14.9                | 3''''       | 4.09 dd             | 9.0, 8.2   | 78.7                |
| 22       | -                   |                  | 111.5               | 4''''       | 4.13 m              |            | 70.7                |
| 23 (2H)  | 2.15 m              |                  | 34.3                | 5'''' a     | 4.23 br d           | 10.6       | 67.3                |
| 24       | 4.83 ddd            | 10.9, 5.5, 5.5   | 72.8                | b           | 3.67 dd             | 10.6, 10.4 |                     |
| 25       | 2.24 m              |                  | 31.7                |             |                     |            |                     |
| 26 ax    | 3.89 br d           | 10.6             | 64.2                | Glc'' 1'''' | 5.04 d              | 7.7        | 101.2               |
| eq       | 3.47 br d           | 10.6             |                     | 2''''       | 4.07 dd             | 8.8, 7.7   | 75.3                |
| 27       | 1.31 d              | 6.9              | 9.9                 | 3''''       | 4.26 dd             | 9.0, 8.8   | 78.7                |
|          |                     |                  |                     | 4''''       | 4.30 dd             | 9.0, 9.0   | 71.6                |
|          |                     |                  |                     | 5''''       | 3.94 m              |            | 78.4                |
|          |                     |                  |                     | 6'''' a     | 4.51 br d           | 10.8       | 62.6                |
|          |                     |                  |                     | b           | 4.39 br d           | 10.8       |                     |

**Table5 .**  $^1\text{H}$ - and  $^{13}\text{C}$ -NMR (500 and 125 MHz,  $\text{C}_5\text{D}_5\text{N}$ ) spectral assignments for **6**

| Position | $\delta_{\text{H}}$ | $J$ (Hz)         | $\delta_{\text{C}}$ | Position    | $\delta_{\text{H}}$ | $J$ (Hz)   | $\delta_{\text{C}}$ |
|----------|---------------------|------------------|---------------------|-------------|---------------------|------------|---------------------|
| 1 ax     | 1.01 m              |                  | 37.6                | Gal 1'      | 4.87 d              | 7.6        | 102.7               |
| eq       | 1.71 br dd          | 12.9, 6.4        |                     | 2'          | 4.42 dd             | 8.5, 7.6   | 73.1                |
| 2 ax     | 1.70 t              | 7.9              | 30.1                | 3'          | 4.08 dd             | 8.5, 8.5   | 75.5                |
| eq       | 2.06 br dd          | 10.1, 6.8        |                     | 4'          | 4.58 br s           |            | 79.8                |
| 3        | 3.88 m              | $W_{1/2} = 22.5$ | 78.0                | 5'          | 3.96 m              |            | 75.3                |
| 4 ax     | 2.44 t              | 10.8             | 39.2                | 6' a        | 4.65 m              |            | 60.5                |
| eq       | 2.64 dd             | 13.9, 3.5        |                     | b           | 4.16 m              |            |                     |
| 5        | -                   |                  | 140.4               |             |                     |            |                     |
| 6        | 5.37 d              | 4.2              | 122.1               | Glc 1''     | 5.17 d              | 7.9        | 105.1               |
| 7 ax     | 2.46 m              |                  | 26.5                | 2''         | 4.41 dd             | 8.5, 7.9   | 81.3                |
| eq       | 1.81 m              |                  |                     | 3''         | 4.16 dd             | 8.9, 8.5   | 86.8                |
| 8        | 1.97 m              |                  | 35.4                | 4''         | 3.81 dd             | 9.1, 8.9   | 70.4                |
| 9        | 1.78 m              |                  | 43.5                | 5''         | 3.88 m              |            | 77.6                |
| 10       | -                   |                  | 37.3                | 6'' a       | 4.54 br d           | 11.1       | 62.9                |
| 11 (2H)  | 1.52 m              |                  | 20.3                | b           | 4.04 br d           | 11.1       |                     |
| 12 ax    | 1.39 br d           | 9.7              | 31.8                |             |                     |            |                     |
| eq       | 2.22 m              |                  |                     | Glc' 1'''   | 5.57 d              | 7.5        | 104.8               |
| 13       | -                   |                  | 44.9                | 2'''        | 3.97 dd             | 8.8, 7.5   | 76.2                |
| 14       | -                   |                  | 86.3                | 3'''        | 4.08 dd             | 9.2, 8.8   | 77.7                |
| 15 a     | 2.28 dd             | 10.6, 7.5        | 39.6                | 4'''        | 4.21 dd             | 9.2, 9.2   | 71.0                |
| b        | 1.82 m              |                  |                     | 5'''        | 4.00 m              |            | 78.6                |
| 16       | 5.05 m              |                  | 82.3                | 6''' a      | 4.57 br d           | 10.8       | 62.4                |
| 17       | 2.73 t              | 7.6              | 59.4                | b           | 4.37 bb             | 10.8, 5.4  |                     |
| 18       | 0.99 s              |                  | 20.0                |             |                     |            |                     |
| 19       | 0.95 s              |                  | 19.3                | Xyl 1''''   | 5.23 d              | 7.8        | 104.9               |
| 20       | 2.07 m              |                  | 42.1                | 2''''       | 3.95 dd             | 8.3, 7.8   | 75.0                |
| 21       | 1.01 d              | 6.9              | 15.1                | 3''''       | 4.07 dd             | 8.5, 8.3   | 78.7                |
| 22       | -                   |                  | 111.9               | 4''''       | 4.12 m              |            | 70.7                |
| 23 ax    | 2.00 dd             | 12.4, 12.4       | 40.9                | 5'''' a     | 4.22 dd             | 10.7, 4.6  | 67.3                |
| eq       | 2.73 dd             | 12.4, 5.3        |                     | b           | 3.67 dd             | 10.7, 10.5 |                     |
| 24       | 4.06 m              |                  | 81.5                |             |                     |            |                     |
| 25       | 1.91 m              |                  | 38.1                | Glc'' 1'''' | 4.94 d              | 7.7        | 106.3               |
| 26 ax    | 3.58 dd             | 11.8, 11.8       | 65.0                | 2''''       | 4.06 dd             | 8.6, 7.7   | 75.7                |
| eq       | 3.60 dd             | 11.8, 4.0        |                     | 3''''       | 4.21 dd             | 8.8, 8.6   | 78.6                |
| 27       | 1.13 d              | 6.5              | 13.5                | 4''''       | 4.28 dd             | 8.8, 8.8   | 71.7                |
|          |                     |                  |                     | 5''''       | 3.90 m              |            | 78.2                |
|          |                     |                  |                     | 6'''' a     | 4.52 br d           | 13.7       | 62.8                |
|          |                     |                  |                     | b           | 4.39 br d           | 13.7       |                     |

**Table 6.**  $^1\text{H}$ - and  $^{13}\text{C}$ -NMR (500 and 125 MHz,  $\text{C}_5\text{D}_5\text{N}$ ) spectral assignments for **10**

| Position | $\delta_{\text{H}}$ | $J$ (Hz)         | $\delta_{\text{C}}$ | Position    | $\delta_{\text{H}}$ | $J$ (Hz)   | $\delta_{\text{C}}$ |
|----------|---------------------|------------------|---------------------|-------------|---------------------|------------|---------------------|
| 1 ax     | 0.96 m              |                  | 37.1                | Gal 1'      | 4.87 d              | 7.6        | 102.8               |
| eq       | 1.66 m              |                  |                     | 2'          | 4.41 dd             | 8.5, 7.6   | 73.1                |
| 2 ax     | 1.69 m              |                  | 30.1                | 3'          | 4.09 m              |            | 75.5                |
| eq       | 2.10 m              |                  |                     | 4'          | 4.58 br s           |            | 79.8                |
| 3        | 3.92 m              | $W_{1/2} = 25.6$ | 78.0                | 5'          | 3.96 m              |            | 75.3                |
| 4 ax     | 2.41 dd             | 13.6, 11.4       | 38.7                | 6'          | a 4.67 dd           | 14.5, 9.4  | 60.5                |
| eq       | 2.69 dd             | 13.6, 2.4        |                     | b           | 4.17 br d           | 14.5       |                     |
| 5        | -                   |                  | 141.6               |             |                     |            |                     |
| 6        | 5.60 br s           |                  | 128.4               | Glc 1"      | 5.17 d              | 7.9        | 105.1               |
| 7        | 4.00 m              |                  | 72.6                | 2"          | 4.41 dd             | 8.5, 7.9   | 81.3                |
| 8        | 1.79 m              |                  | 40.8                | 3"          | 4.16 dd             | 8.8, 8.5   | 86.7                |
| 9        | 1.06 m              |                  | 48.6                | 4"          | 3.81 dd             | 9.2, 8.8   | 70.4                |
| 10       | -                   |                  | 36.9                | 5"          | 3.87 m              |            | 77.6                |
| 11 (2H)  | 1.44 m              |                  | 21.1                | 6"          | a 4.53 m            |            | 62.9                |
| 12 ax    | 1.74 br d           | 13.5             | 39.9                | b           | 4.05 m              |            |                     |
| eq       | 1.14 m              |                  |                     |             |                     |            |                     |
| 13       | -                   |                  | 41.2                | Glc' 1'''   | 5.56 d              | 7.5        | 104.8               |
| 14       | 1.35 m              |                  | 56.2                | 2'''        | 4.08 dd             | 8.8, 7.5   | 76.2                |
| 15 a     | 2.85 m              |                  | 35.4                | 3'''        | 4.10 dd             | 9.0, 8.8   | 77.7                |
| b        | 2.04 m              |                  |                     | 4'''        | 4.21 dd             | 9.0, 9.0   | 71.0                |
| 16       | 5.04 m              |                  | 81.6                | 5'''        | 3.93 m              |            | 78.6                |
| 17       | 1.94 m              |                  | 63.3                | 6'''        | a 4.58 br d         | 12.7       | 62.4                |
| 18       | 0.94 s              |                  | 16.4                | b           | 4.38 dd             | 12.7, 5.4  |                     |
| 19       | 0.85 s              |                  | 18.8                |             |                     |            |                     |
| 20       | 2.24 t              | 6.6              | 40.7                | Xyl 1''''   | 5.22 d              | 7.8        | 104.9               |
| 21       | 1.34 d              | 6.9              | 16.4                | 2''''       | 3.97 dd             | 8.3, 7.8   | 75.0                |
| 22       | -                   |                  | 110.6               | 3''''       | 4.09 dd             | 8.9, 8.3   | 78.7                |
| 23 a     | 2.08 m              |                  | 37.2                | 4''''       | 4.11 m              |            | 70.7                |
| b        | 1.96 m              |                  |                     | 5''''       | a 4.22 m            |            | 67.3                |
| 24 a     | 2.09 m              |                  | 28.3                | b           | 3.66 dd             | 10.7, 10.3 |                     |
| b        | 1.68 m              |                  |                     |             |                     |            |                     |
| 25       | 1.92 m              |                  | 34.4                | Glc'' 1'''' | 4.80 d              | 7.7        | 105.1               |
| 26 a     | 3.96 dd             | 9.2, 5.6         | 75.4                | 2''''       | 4.02 dd             | 8.8, 7.7   | 75.2                |
| b        | 3.45 dd             | 9.2, 7.0         |                     | 3''''       | 4.24 dd             | 8.8, 8.8   | 78.6                |
| 27       | 1.01 d              | 6.7              | 17.3                | 4''''       | 4.23 dd             | 8.8, 8.8   | 71.7                |
|          |                     |                  |                     | 5''''       | 3.92 m              |            | 78.4                |
|          |                     |                  |                     | 6''''       | a 4.55 br d         | 12.7       | 62.8                |
| 7-OH     | 5.71 br d           | 7.9              |                     | b           | 4.38 dd             | 12.7, 5.4  |                     |

**Table 7.** <sup>1</sup>H- and <sup>13</sup>C-NMR (500 and 125 MHz, C<sub>5</sub>D<sub>5</sub>N) spectral assignments for **10a**

| Position | δ <sub>H</sub> | <i>J</i> (Hz)                  | δ <sub>C</sub> | Position  | δ <sub>H</sub> | <i>J</i> (Hz) | δ <sub>C</sub> |
|----------|----------------|--------------------------------|----------------|-----------|----------------|---------------|----------------|
| 1 ax     | 0.95 ddd       | 14.4, 13.3, 3.3                | 37.2           | Gal 1'    | 4.89 d         | 7.6           | 102.8          |
| eq       | 1.66 br dd     | 14.4, 3.3                      |                | 2'        | 4.43 dd        | 8.2, 7.6      | 73.1           |
| 2 ax     | 1.67 m         |                                | 30.1           | 3'        | 4.08 dd        | 8.6, 8.2      | 75.5           |
| eq       | 2.11 m         |                                |                | 4'        | 4.58 br s      |               | 79.8           |
| 3        | 3.91 m         | <i>W</i> <sub>1/2</sub> = 28.7 | 78.0           | 5'        | 3.97 m         |               | 75.3           |
| 4 ax     | 2.42 dd        | 13.5, 11.7                     | 38.8           | 6' a      | 4.67 dd        | 14.8, 9.6     | 60.5           |
| eq       | 2.69 dd        | 13.5, 2.4                      |                | b         | 4.18 m         |               |                |
| 5        | -              |                                | 141.6          | Glc 1''   | 5.18 d         | 7.9           | 105.1          |
| 6        | 5.61 br s      |                                | 128.5          | 2''       | 4.43 dd        | 8.7, 7.9      | 81.3           |
| 7        | 4.01 m         |                                | 72.6           | 3''       | 4.16 dd        | 9.0, 8.7      | 86.7           |
| 8        | 1.78 ddd       | 15.3, 13.1, 8.7                | 40.7           | 4''       | 3.82 dd        | 9.0, 9.0      | 70.4           |
| 9        | 1.05 ddd       | 8.7, 6.8, 3.0                  | 48.6           | 5''       | 3.88 ddd       | 9.0, 5.7, 2.1 | 77.6           |
| 10       | -              |                                | 37.0           | 6'' a     | 4.52 dd        | 11.0, 5.7     | 63.0           |
| 11 ax    | 1.37 m         |                                | 21.2           | b         | 4.06 dd        | 11.0, 2.1     |                |
| eq       | 1.45 m         |                                |                | Glc' 1''' | 5.58 d         | 7.5           | 104.9          |
| 12 ax    | 1.68 ddd       | 12.0, 12.0, 4.3                | 39.9           | 2'''      | 4.06 dd        | 8.8, 7.5      | 76.2           |
| eq       | 1.11 br d      | 12.0                           |                | 3'''      | 4.11 dd        | 8.8, 8.8      | 77.7           |
| 13       | -              |                                | 40.9           | 4'''      | 4.22 dd        | 8.8, 8.8      | 71.0           |
| 14       | 1.32 m         |                                | 56.3           | 5'''      | 3.94 m         |               | 78.6           |
| 15 a     | 2.84 ddd       | 13.2, 6.5, 6.5                 | 35.1           | 6''' a    | 4.59 br d      | 12.6          | 62.5           |
| b        | 2.00 ddd       | 13.2, 13.2, 6.5                |                | b         | 4.38 dd        | 12.6, 3.7     |                |
| 16       | 4.62 m         |                                | 81.7           | Xyl 1'''' | 5.23 d         | 7.8           | 104.8          |
| 17       | 1.81 dd        | 8.3, 6.5                       | 62.3           | 2''''     | 3.97 dd        | 8.1, 7.8      | 75.1           |
| 18       | 0.88 s         |                                | 16.4           | 3''''     | 4.09 dd        | 8.6, 8.1      | 78.7           |
| 19       | 0.84 s         |                                | 18.9           | 4''''     | 4.13 m         |               | 70.7           |
| 20       | 1.92 m         |                                | 42.5           | 5'''' a   | 4.23 dd        | 11.4, 4.9     | 67.3           |
| 21       | 1.17 d         | 7.0                            | 14.9           | b         | 3.68 dd        | 11.4, 10.7    |                |
| 22       | -              |                                | 109.7          |           |                |               |                |
| 23 ax    | 1.90 ddd       | 13.7, 13.7, 4.7                | 26.4           |           |                |               |                |
| eq       | 1.43 br dd     | 13.7, 2.1                      |                |           |                |               |                |
| 24 ax    | 2.14 m         |                                | 26.2           |           |                |               |                |
| eq       | 1.35 m         |                                |                |           |                |               |                |
| 25       | 1.57 m         |                                | 27.5           |           |                |               |                |
| 26 ax    | 4.05 dd        | 11.0, 3.0                      | 65.0           |           |                |               |                |
| eq       | 3.35 br d      | 11.0                           |                |           |                |               |                |
| 27       | 1.07 d         | 7.1                            | 16.3           |           |                |               |                |
| 7-OH     | 5.73 br d      | 7.8                            |                |           |                |               |                |



**Table 8.**  $^1\text{H}$ - and  $^{13}\text{C}$ -NMR (500 and 125 MHz,  $\text{C}_5\text{D}_5\text{N}$ ) spectral assignments for **11**

| Position | $\delta_{\text{H}}$ | $J$ (Hz)         | $\delta_{\text{C}}$ | Position     | $\delta_{\text{H}}$ | $J$ (Hz)   | $\delta_{\text{C}}$ |
|----------|---------------------|------------------|---------------------|--------------|---------------------|------------|---------------------|
| 1 ax     | 1.02 m              |                  | 37.7                | Gal 1'       | 4.86 d              | 7.6        | 102.6               |
| eq       | 1.73 br d           | 12.8             |                     | 2'           | 4.40 dd             | 8.5, 7.6   | 73.1                |
| 2 ax     | 1.72 t              | 12.8             | 30.1                | 3'           | 4.11 m              |            | 75.5                |
| eq       | 2.08 br d           | 10.4             |                     | 4'           | 4.58 br s           |            | 79.8                |
| 3        | 3.85 m              | $W_{1/2} = 23.8$ | 78.1                | 5'           | 3.97 m              |            | 75.2                |
| 4 ax     | 2.44 t              | 12.5             | 39.2                | 6'           | a 4.65 dd           | 12.1, 8.1  | 60.5                |
| eq       | 2.66 dd             | 13.5, 2.0        |                     | b            | 4.16 br d           | 12.1       |                     |
| 5        | -                   |                  | 140.5               |              |                     |            |                     |
| 6        | 5.38 br d           | 5.6              | 122.1               | Glc 1''      | 5.17 d              | 7.9        | 105.1               |
| 7        | 2.45 m              |                  | 26.7                | 2''          | 4.41 dd             | 8.8, 7.9   | 81.3                |
|          | 1.86 m              |                  |                     | 3''          | 4.14 dd             | 8.8, 8.8   | 86.7                |
| 8        | 1.96 m              |                  | 35.0                | 4''          | 3.80 dd             | 9.3, 8.8   | 70.4                |
| 9        | 1.79 m              |                  | 43.5                | 5''          | 3.85 m              |            | 77.5                |
| 10       | -                   |                  | 37.3                | 6''          | a 4.51 br d         | 10.8       | 62.9                |
| 11 (2H)  | 1.54 m              |                  | 20.5                | b            | 4.04 dd             | 10.8, 5.3  |                     |
| 12 ax    | 1.47 m              |                  | 31.7                |              |                     |            |                     |
| eq       | 2.31 br d           | 13.5             |                     | Glc' 1'''    | 5.56 d              | 7.5        | 104.8               |
| 13       | -                   |                  | 47.8                | 2'''         | 4.05 dd             | 8.8, 7.5   | 76.2                |
| 14       | -                   |                  | 84.7                | 3'''         | 4.07 dd             | 9.0, 8.8   | 77.7                |
| 15 a     | 2.42 dd             | 13.0, 7.7        | 42.4                | 4'''         | 4.19 dd             | 9.0, 9.0   | 71.0                |
| b        | 1.92 dd             | 13.0, 5.4        |                     | 5'''         | 4.07 m              |            | 78.5                |
| 16       | 5.27 m              |                  | 85.1                | 6'''         | a 4.54 br d         | 12.4       | 62.3                |
| 17       | 3.36 d              | 9.7              | 61.5                | b            | 4.35 dd             | 12.4, 5.4  |                     |
| 18       | 0.93 s              |                  | 17.7                |              |                     |            |                     |
| 19       | 0.98 s              |                  | 19.3                | Xyl 1''''    | 5.22 d              | 7.8        | 104.9               |
| 20       | -                   |                  | 103.9               | 2''''        | 3.95 dd             | 8.4, 7.8   | 75.2                |
| 21       | 1.67 s              |                  | 11.9                | 3''''        | 4.08 dd             | 9.2, 8.4   | 78.7                |
| 22       | -                   |                  | 152.2               | 4''''        | 4.10 m              |            | 70.7                |
| 23 (2H)  | 2.24 m              |                  | 23.7                | 5''''        | a 4.22 m            |            | 67.3                |
| 24 a     | 1.88 m              |                  | 31.4                | b            | 3.67 dd             | 10.6, 10.4 |                     |
| b        | 1.48 m              |                  |                     |              |                     |            |                     |
| 25       | 1.96 m              |                  | 33.7                | Glc'' 1''''' | 4.83 d              | 7.8        | 105.1               |
| 26 a     | 3.94 dd             | 9.3, 6.6         | 75.2                | 2'''''       | 4.03 dd             | 8.4, 7.8   | 75.2                |
| b        | 3.50 dd             | 9.3, 7.3         |                     | 3'''''       | 4.25 dd             | 8.8, 8.4   | 78.5                |
| 27       | 1.04 d              | 6.6              | 17.1                | 4'''''       | 4.23 dd             | 8.8, 8.4   | 71.7                |
|          |                     |                  |                     | 5'''''       | 3.95 m              |            | 78.4                |
|          |                     |                  |                     | 6'''''       | a 4.56 br d         | 11.5       | 62.8                |
|          |                     |                  |                     | b            | 4.38 br d           | 11.5       |                     |

| <b>Table 9.</b> <sup>1</sup> H- and <sup>13</sup> C-NMR (500 and 125 MHz, C <sub>5</sub> D <sub>5</sub> N) spectral assignments for <b>12</b> |    |                |      |                         |                |           |        |                |      |          |                |
|-----------------------------------------------------------------------------------------------------------------------------------------------|----|----------------|------|-------------------------|----------------|-----------|--------|----------------|------|----------|----------------|
| positions                                                                                                                                     |    | δ <sub>H</sub> |      | J (Hz)                  | δ <sub>C</sub> | positions |        | δ <sub>H</sub> |      | J (Hz)   | δ <sub>C</sub> |
| 1                                                                                                                                             | ax | 0.96           | m    |                         | 37.5           | Gal       | 1'     | 4.88           | d    | 7.5      | 102.7          |
|                                                                                                                                               | eq | 1.67           | br d | 12.6                    |                |           | 2'     | 4.39           | dd   | 8.3, 7.5 | 73.1           |
| 2                                                                                                                                             | ax | 1.70           | br d | 11.7                    | 30.1           |           | 3'     | 4.11           | m    |          | 75.5           |
|                                                                                                                                               | eq | 2.09           | m    |                         |                |           | 4'     | 4.59           | br s |          | 79.8           |
| 3                                                                                                                                             |    | 3.87           |      | W <sub>1/2</sub> = 23.6 | 78.1           |           | 5'     | 3.97           | m    |          | 75.3           |
| 4                                                                                                                                             | ax | 2.42           | t    | 12.3                    | 39.2           |           | 6'     | a              | 4.66 | dd       | 14.2, 9.1      |
|                                                                                                                                               | eq | 2.65           | dd   | 10.6, 2.4               |                |           |        | b              | 4.16 | br d     | 9.1            |
| 5                                                                                                                                             |    | -              |      |                         | 141.0          |           |        |                |      |          |                |
| 6                                                                                                                                             |    | 5.30           | br d | 3.9                     | 121.6          | Glc( I )  | 1"     | 5.18           | d    | 7.8      | 105.1          |
| 7                                                                                                                                             | ax | 1.46           | m    |                         | 31.6           |           | 2"     | 4.41           | dd   | 8.8, 7.8 | 81.3           |
|                                                                                                                                               | eq | 2.09           | m    |                         |                |           | 3"     | 4.16           | dd   | 9.2, 8.8 | 86.7           |
| 8                                                                                                                                             |    | 1.48           | m    |                         | 31.3           |           | 4"     | 3.81           | dd   | 9.2, 8.9 | 70.4           |
| 9                                                                                                                                             |    | 0.87           | m    |                         | 50.2           |           | 5"     | 3.87           | m    |          | 77.5           |
| 10                                                                                                                                            |    | -              |      |                         | 37.0           |           | 6"     | a              | 4.51 | br d     | 9.7            |
| 11 (2H)                                                                                                                                       |    | 1.42           | m    |                         | 21.2           |           |        | b              | 4.05 | br d     | 9.7            |
| 12                                                                                                                                            | ax | 1.13           | m    |                         | 39.6           |           |        |                |      |          |                |
|                                                                                                                                               | eq | 1.73           | br d | 12.5                    |                | Glc( II ) | 1'''   | 5.56           | d    | 7.3      | 104.8          |
| 13                                                                                                                                            |    | -              |      |                         | 43.4           |           | 2'''   | 4.07           | dd   | 8.8, 7.3 | 76.2           |
| 14                                                                                                                                            |    | 0.83           | m    |                         | 54.9           |           | 3'''   | 4.09           | dd   | 9.2, 8.8 | 77.7           |
| 15                                                                                                                                            | a  | 1.47           | br d | 7.1                     | 34.4           |           | 4'''   | 4.20           | m    |          | 71.0           |
|                                                                                                                                               | b  | 2.09           | br d | 7.0                     |                |           | 5'''   | 3.91           | m    |          | 78.4           |
| 16                                                                                                                                            |    | 4.80           | m    |                         | 84.4           |           | 6'''   | a              | 4.57 | br d     | 9.0            |
| 17                                                                                                                                            |    | 2.44           | d    | 9.9                     | 64.5           |           |        | b              | 4.37 | br d     | 9.0            |
| 18                                                                                                                                            |    | 0.70           | s    |                         | 14.1           |           |        |                |      |          |                |
| 19                                                                                                                                            |    | 0.89           | s    |                         | 19.3           | Xyl       | 1''''  | 5.22           | d    | 7.7      | 104.9          |
| 20                                                                                                                                            |    | -              |      |                         | 103.5          |           | 2''''  | 3.98           | dd   | 8.5, 7.7 | 75.0           |
| 21                                                                                                                                            |    | 1.62           | s    |                         | 11.8           |           | 3''''  | 4.08           | m    |          | 78.7           |
| 22                                                                                                                                            |    | -              |      |                         | 152.4          |           | 4''''  | 4.09           | m    |          | 70.7           |
| 23                                                                                                                                            | a  | 2.23           | m    |                         | 23.6           |           | 5''''  | a              | 4.22 | m        | 67.3           |
|                                                                                                                                               | b  | 2.17           | m    |                         |                |           |        | b              | 3.67 | dd       | 10.7, 10.6     |
| 24                                                                                                                                            | a  | 1.87           | m    |                         | 32.3           |           |        |                |      |          |                |
|                                                                                                                                               | b  | 1.50           | m    |                         |                | Glc(III)  | 1''''' | 4.82           | d    | 7.7      | 105.1          |
| 25                                                                                                                                            |    | 1.94           | m    |                         | 33.7           |           | 2''''' | 4.01           | br d | 7.5      | 75.2           |
| 26                                                                                                                                            | a  | 3.48           | dd   | 9.1, 7.1                | 75.4           |           | 3''''' | 4.23           | dd   | 8.5, 8.0 | 78.5           |
|                                                                                                                                               | b  | 4.05           | m    |                         |                |           | 4''''' | 4.22           | dd   | 8.5, 8.0 | 71.7           |
| 27                                                                                                                                            |    | 1.03           | d    | 6.6                     | 17.1           |           | 5''''' | 3.96           | m    |          | 78.6           |
|                                                                                                                                               |    |                |      |                         |                |           | 6''''' | 4.55           | br d | 8.9      | 62.8           |
|                                                                                                                                               |    |                |      |                         |                |           |        | 4.38           | br d | 8.9      |                |

**Table 10.**  $^1\text{H}$ - and  $^{13}\text{C}$ -NMR (500 and 125 MHz,  $\text{C}_5\text{D}_5\text{N}$ ) spectral assignments for **13**

| Position | $\delta_{\text{H}}$ | $J$ (Hz)         | $\delta_{\text{C}}$ | Position    | $\delta_{\text{H}}$ | $J$ (Hz)   | $\delta_{\text{C}}$ |
|----------|---------------------|------------------|---------------------|-------------|---------------------|------------|---------------------|
| 1 ax     | 0.96 ddd            | 12.8, 11.0, 3.0  | 37.4                | Gal 1'      | 4.89 d              | 7.6        | 102.7               |
| eq       | 1.66 br d           | 11.1             |                     | 2'          | 4.42 dd             | 8.6, 7.6   | 73.1                |
| 2 ax     | 1.68 t              | 13.6             | 30.0                | 3'          | 4.11 m              |            | 75.5                |
| eq       | 2.11 m              |                  |                     | 4'          | 4.60 br d           | 2.3        | 79.8                |
| 3        | 3.89 m              | $W_{1/2} = 22.8$ | 78.1                | 5'          | 3.97 m              |            | 75.3                |
| 4 ax     | 2.42 dd             | 13.0, 11.8       | 39.2                | 6'          | a 4.68 dd           | 15.8, 9.6  | 60.5                |
| eq       | 2.65 dd             | 13.0, 2.3        |                     | b           | 4.18 m              |            |                     |
| 5        | -                   |                  | 141.0               |             |                     |            |                     |
| 6        | 5.29 br s           |                  | 121.5               | Glc 1''     | 5.19 d              | 7.9        | 105.1               |
| 7 ax     | 1.49 m              |                  | 31.9                | 2''         | 4.42 dd             | 8.6, 7.9   | 81.3                |
| eq       | 1.83 dd             | 13.5, 2.3        |                     | 3''         | 4.16 dd             | 8.8, 8.6   | 86.7                |
| 8        | 1.50 m              |                  | 31.0                | 4''         | 3.82 dd             | 9.2, 8.8   | 70.4                |
| 9        | 0.84 m              |                  | 50.0                | 5''         | 3.88 m              |            | 77.6                |
| 10       | -                   |                  | 36.9                | 6''         | a 4.53 br d         | 11.6       | 62.9                |
| 11 (2H)  | 1.39 m              |                  | 20.5                | b           | 4.05 br d           | 11.6       |                     |
| 12 ax    | 1.17 br d           | 12.1             | 39.2                |             |                     |            |                     |
| eq       | 1.89 m              |                  |                     | Glc' 1'''   | 5.58 d              | 7.4        | 104.8               |
| 13       | -                   |                  | 40.3                | 2'''        | 4.08 dd             | 8.8, 7.4   | 76.2                |
| 14       | 0.96 m              |                  | 56.8                | 3'''        | 4.10 dd             | 9.0, 8.8   | 77.7                |
| 15 a     | 2.05 m              |                  | 33.4                | 4'''        | 4.23 dd             | 9.0, 9.0   | 71.0                |
| b        | 1.48 m              |                  |                     | 5'''        | 3.93 m              |            | 78.6                |
| 16       | 5.20 m              |                  | 84.2                | 6'''        | a 4.59 br d         | 12.4       | 62.4                |
| 17       | 2.23 d              | 6.3              | 67.8                | b           | 4.38 br d           | 12.4       |                     |
| 18       | 0.90 s              |                  | 13.5                |             |                     |            |                     |
| 19       | 0.90 s              |                  | 19.3                | Xyl 1''''   | 5.24 d              | 7.8        | 104.9               |
| 20       | -                   |                  | 76.7                | 2''''       | 3.98 dd             | 8.5, 7.8   | 75.1                |
| 21       | 1.73 s              |                  | 21.8                | 3''''       | 4.09 dd             | 9.2, 8.5   | 78.7                |
| 22       | -                   |                  | 163.0               | 4''''       | 4.12 m              |            | 70.7                |
| 23       | 4.53 br d           | 13.8             | 91.3                | 5''''       | a 4.23 dd           | 10.6, 4.7  | 67.3                |
| 24 a     | 2.52 m              |                  | 29.6                | b           | 3.68 dd             | 10.6, 10.4 |                     |
| b        | 2.15 m              |                  |                     |             |                     |            |                     |
| 25       | 2.09 m              |                  | 34.8                | Glc'' 1'''' | 4.85 d              | 7.7        | 105.1               |
| 26 a     | 4.16 dd             | 9.1, 6.0         | 75.3                | 2''''       | 4.04 dd             | 8.8, 7.7   | 75.3                |
| b        | 3.53 dd             | 9.1, 7.1         |                     | 3''''       | 4.25 dd             | 9.0, 8.8   | 78.7                |
| 27       | 1.08 d              | 6.3              | 17.4                | 4''''       | 4.23 dd             | 9.0, 9.0   | 71.6                |
|          |                     |                  |                     | 5''''       | 3.95 m              |            | 78.4                |
|          |                     |                  |                     | 6''''       | a 4.55 m            |            | 62.7                |
|          |                     |                  |                     | b           | 4.41 br d           | 11.9       |                     |

**Table 11.**  $^1\text{H}$ - and  $^{13}\text{C}$ -NMR (500 and 125 MHz,  $\text{C}_5\text{D}_5\text{N}$ ) spectral assignments for **13a**

| Position | $\delta_{\text{H}}$ | $J$ (Hz)         | $\delta_{\text{C}}$ | Position  | $\delta_{\text{H}}$ | $J$ (Hz)  | $\delta_{\text{C}}$ |
|----------|---------------------|------------------|---------------------|-----------|---------------------|-----------|---------------------|
| 1 ax     | 0.96 ddd            | 12.0, 12.0, 3.9  | 37.4                | Gal 1'    | 4.89 d              | 7.7       | 102.8               |
| eq       | 1.67 br d           | 12.0             |                     | 2'        | 4.42 dd             | 8.8, 7.7  | 73.2                |
| 2 ax     | 1.71 m              |                  | 30.1                | 3'        | 4.10 m              |           | 75.6                |
| eq       | 2.09 m              |                  |                     | 4'        | 4.60 br d           | 2.6       | 79.9                |
| 3        | 3.89 m              | $W_{1/2} = 23.6$ | 78.2                | 5'        | 3.98 m              |           | 75.3                |
| 4 ax     | 2.43 br d           | 13.3             | 39.2                | 6' a      | 4.68 m              |           | 60.5                |
| eq       | 2.66 dd             | 13.3, 2.5        |                     | b         | 4.18 br d           | 13.2      |                     |
| 5        | -                   |                  | 141.1               |           |                     |           |                     |
| 6        | 5.32 br d           | 5.0              | 121.7               | Glc 1''   | 5.19 d              | 7.9       | 105.2               |
| 7 ax     | 1.48 br dd          | 13.3, 13.3       | 32.3                | 2''       | 4.44 dd             | 8.6, 7.9  | 81.3                |
| eq       | 1.87 br d           | 13.3             |                     | 3''       | 4.18 dd             | 8.8, 8.6  | 86.7                |
| 8        | 1.59 m              |                  | 30.8                | 4''       | 3.83 dd             | 9.2, 8.8  | 70.5                |
| 9        | 0.85 m              |                  | 50.3                | 5''       | 3.88 m              |           | 77.6                |
| 10       | -                   |                  | 37.1                | 6'' a     | 4.53 dd             | 11.0, 2.4 | 63.0                |
| 11 (2H)  | 1.42 m              |                  | 20.9                | b         | 4.06 dd             | 11.0, 4.6 |                     |
| 12 ax    | 1.21 m              |                  | 41.4                |           |                     |           |                     |
| eq       | 1.99 br d           | 12.1             |                     | Glc' 1''' | 5.58 d              | 7.4       | 104.9               |
| 13       | -                   |                  | 41.6                | 2'''      | 4.09 dd             | 8.8, 7.4  | 76.2                |
| 14       | 0.88 m              |                  | 56.3                | 3'''      | 4.11 dd             | 9.0, 8.8  | 77.7                |
| 15 a     | 2.04 m              |                  | 34.2                | 4'''      | 4.21 dd             | 9.0, 9.0  | 71.0                |
| b        | 1.48 m              |                  |                     | 5'''      | 3.93 m              |           | 78.7                |
| 16       | 5.06 m              |                  | 82.8                | 6''' a    | 4.59 br d           | 12.4      | 62.5                |
| 17       | 2.44 d              | 8.5              | 70.2                | b         | 4.38 dd             | 12.4, 4.7 |                     |
| 18       | 1.19 s              |                  | 15.8                |           |                     |           |                     |
| 19       | 0.93 s              |                  | 19.4                | Xyl 1'''' | 5.24 d              | 7.8       | 105.0               |
| 20       | -                   |                  | 82.6                | 2''''     | 3.98 dd             | 8.3, 7.8  | 75.1                |
| 21       | 1.73 s              |                  | 20.5                | 3''''     | 4.10 dd             | 9.0, 8.3  | 78.7                |
| 22       | -                   |                  | 110.1               | 4''''     | 4.12 m              |           | 70.7                |
| 23 ax    | 1.79 br dd          | 12.9, 5.8        | 30.2                | 5'''' a   | 4.23 dd             | 10.9, 5.1 | 67.4                |
| eq       | 2.37 br d           | 12.9             |                     | b         | 3.69 dd             | 10.9, 9.8 |                     |
| 24 (2H)  | 1.70 m              |                  | 29.5                |           |                     |           |                     |
| 25       | 1.69 m              |                  | 30.6                |           |                     |           |                     |
| 26 ax    | 3.70 dd             | 11.5, 10.0       | 67.3                |           |                     |           |                     |
| eq       | 3.60 dd             | 11.5, 3.8        |                     |           |                     |           |                     |
| 27       | 0.75 d              | 5.5              | 17.3                |           |                     |           |                     |

**Table 12.**  $^1\text{H}$ - and  $^{13}\text{C}$ -NMR (500 and 125 MHz,  $\text{C}_5\text{D}_5\text{N}$ ) spectral assignments for **14**

| Position | $\delta_{\text{H}}$ | $J$ (Hz)         | $\delta_{\text{C}}$ | Position    | $\delta_{\text{H}}$ | $J$ (Hz)   | $\delta_{\text{C}}$ |
|----------|---------------------|------------------|---------------------|-------------|---------------------|------------|---------------------|
| 1 ax     | 0.94 m              |                  | 37.4                | Gal 1'      | 4.89 d              | 7.6        | 102.7               |
| eq       | 1.64 br d           | 13.4             |                     | 2'          | 4.42 dd             | 8.2, 7.6   | 73.2                |
| 2 ax     | 1.68 t              | 15.3             | 30.1                | 3'          | 4.07 m              |            | 75.5                |
| eq       | 2.08 m              |                  |                     | 4'          | 4.60 br s           |            | 79.8                |
| 3        | 3.89 m              | $W_{1/2} = 20.3$ | 78.0                | 5'          | 3.97 m              |            | 75.3                |
| 4 ax     | 2.42 dd             | 14.2, 13.4       | 39.2                | 6' a        | 4.68 dd             | 14.5, 9.4  | 60.5                |
| eq       | 2.65 dd             | 13.4, 2.1        |                     | b           | 4.18 m              |            |                     |
| 5        | -                   |                  | 141.2               |             |                     |            |                     |
| 6        | 5.30 br d           | 4.3              | 121.4               | Glc 1''     | 5.19 d              | 7.9        | 105.2               |
| 7 ax     | 1.84 m              |                  | 31.9                | 2''         | 4.43 dd             | 8.8, 7.9   | 81.3                |
| eq       | 1.48 m              |                  |                     | 3''         | 4.17 dd             | 8.8, 8.8   | 86.7                |
| 8        | 1.48 m              | 13.1             | 30.9                | 4''         | 3.83 dd             | 9.0, 8.8   | 70.5                |
| 9        | 0.86 m              |                  | 50.3                | 5''         | 3.87 br dd          | 9.0, 1.7   | 77.6                |
| 10       | -                   |                  | 36.9                | 6'' a       | 4.53 br d           | 11.0       | 63.0                |
| 11 (2H)  | 1.42 m              |                  | 20.6                | b           | 4.05 dd             | 11.0, 1.7  |                     |
| 12 ax    | 1.08 br dd          | 16.5, 10.2       | 38.1                |             |                     |            |                     |
| eq       | 2.16 m              |                  |                     | Glc' 1'''   | 5.58 d              | 7.4        | 104.9               |
| 13       | -                   |                  | 42.3                | 2'''        | 4.09 dd             | 8.8, 7.4   | 76.2                |
| 14       | 0.79 m              |                  | 54.0                | 3'''        | 4.11 dd             | 8.8, 8.8   | 77.7                |
| 15 a     | 2.38 m              |                  | 35.5                | 4'''        | 4.22 dd             | 9.0, 8.8   | 71.0                |
| b        | 1.27 ddd            | 13.0, 13.0, 4.3  |                     | 5'''        | 3.94 m              |            | 78.6                |
| 16       | 5.66 m              |                  | 74.7                | 6''' a      | 4.59 br d           | 13.1       | 62.5                |
| 17       | 2.48 d              | 7.6              | 66.6                | b           | 4.39 br d           | 13.1       |                     |
| 18       | 1.20 s              |                  | 13.8                |             |                     |            |                     |
| 19       | 0.87 s              |                  | 19.4                | Xyl 1''''   | 5.24 d              | 7.8        | 104.9               |
| 20       | -                   |                  | 205.5               | 2''''       | 3.98 dd             | 8.0, 7.8   | 75.1                |
| 21       | 2.13 s              |                  | 30.5                | 3''''       | 4.08 dd             | 8.8, 8.0   | 78.7                |
| 22       | -                   |                  | 173.2               | 4''''       | 4.10 m              |            | 70.7                |
| 23 a     | 1.84 m              |                  | 32.2                | 5'''' a     | 4.23 dd             | 10.9, 4.4  | 67.3                |
| b        | 1.47 m              |                  |                     | b           | 3.68 dd             | 10.9, 10.4 |                     |
| 24 a     | 1.96 m              |                  | 29.0                |             |                     |            |                     |
| b        | 1.59 m              |                  |                     | Glc'' 1'''' | 4.80 d              | 7.8        | 105.2               |
| 25       | 1.88 m              |                  | 33.5                | 2''''       | 4.03 dd             | 9.0, 7.8   | 75.2                |
| 26 a     | 3.97 dd             | 9.5, 6.1         | 74.7                | 3''''       | 4.23 dd             | 9.0, 9.0   | 78.6                |
| b        | 3.45 dd             | 9.5, 6.4         |                     | 4''''       | 0.22 dd             | 9.0, 9.0   | 71.5                |
| 27       | 0.92 d              | 8.3              | 16.9                | 5''''       | 3.92 m              |            | 78.5                |
|          |                     |                  |                     | 6'''' a     | 4.58 br d           | 13.1       | 62.8                |
|          |                     |                  |                     | b           | 4.38 br d           | 13.1       |                     |

**Table 13.**  $^1\text{H}$ - and  $^{13}\text{C}$ -NMR (600 and 150 MHz,  $\text{C}_5\text{D}_5\text{N}$ ) spectral assignments for **15**

| Position | $\delta_{\text{H}}$ | $J$ (Hz)         | $\delta_{\text{C}}$ | Position  | $\delta_{\text{H}}$ | $J$ (Hz)      | $\delta_{\text{C}}$ |
|----------|---------------------|------------------|---------------------|-----------|---------------------|---------------|---------------------|
| 1 ax     | 0.88 br dd          | 12.4, 12.4       | 36.8                | Gal 1'    | 4.88 d              | 7.8           | 102.5               |
| eq       | 1.56 m              |                  |                     | 2'        | 4.43 dd             | 8.4, 7.8      | 72.9                |
| 2 ax     | 1.65 m              |                  | 30.1                | 3'        | 4.09 m              |               | 75.3                |
| eq       | 2.05 br d           | 15.5, 5.5        |                     | 4'        | 4.58 br d           | 3.6           | 79.6                |
| 3        | 3.87 m              | $W_{1/2} = 18.9$ | 77.8                | 5'        | 3.95 m              |               | 75.1                |
| 4 ax     | 2.39 dd             | 13.2, 10.8       | 39.0                | 6' a      | 4.66 dd             | 15.0, 9.6     | 60.3                |
| eq       | 2.64 dd             | 13.2, 2.4        |                     | b         | 4.15 m              |               |                     |
| 5        | -                   |                  | 141.2               |           |                     |               |                     |
| 6        | 5.29 br d           | 5.4              | 121.1               | Glc 1''   | 5.18 d              | 7.8           | 105.0               |
| 7 ax     | 1.82 m              |                  | 31.5                | 2''       | 4.43 dd             | 8.4, 7.8      | 81.1                |
| eq       | 1.51 m              |                  |                     | 3''       | 4.16 dd             | 9.0, 8.4      | 86.4                |
| 8        | 1.49 m              |                  | 30.0                | 4''       | 3.81 dd             | 9.0, 9.0      | 70.2                |
| 9        | 0.87 m              |                  | 50.4                | 5''       | 3.87 ddd            | 9.0, 5.4, 2.4 | 77.4                |
| 10       | -                   |                  | 37.0                | 6'' a     | 4.50 dd             | 9.6, 2.4      | 62.7                |
| 11 (2H)  | 1.44 m              |                  | 21.0                | b         | 4.03 dd             | 9.6, 5.4      |                     |
| 12 ax    | 1.32 m              |                  | 34.9                |           |                     |               |                     |
| eq       | 2.58 ddd            | 12.0, 3.6, 3.0   |                     | Glc' 1''' | 5.58 d              | 7.8           | 104.7               |
| 13       | -                   |                  | 46.0                | 2'''      | 4.05 dd             | 8.8, 7.8      | 76.0                |
| 14       | 1.30 m              |                  | 56.2                | 3'''      | 4.09 dd             | 9.0, 8.8      | 77.8                |
| 15 a     | 2.11 ddd            | 16.8, 6.0, 2.8   | 32.2                | 4'''      | 4.20 dd             | 9.6, 9.0      | 70.7                |
| b        | 1.84 br dd          | 16.8, 2.8        |                     | 5'''      | 3.92 m              | 9.6, 4.2, 1.8 | 78.4                |
| 16       | 6.57 br s           |                  | 144.5               | 6''' a    | 4.58 dd             | 11.4, 1.8     | 62.2                |
| 17       | -                   |                  | 155.0               | b         | 4.36 dd             | 11.4, 4.2     |                     |
| 18       | 0.90 s              |                  | 15.7                |           |                     |               |                     |
| 19       | 0.86 s              |                  | 19.0                | Xyl 1'''' | 5.23 d              | 7.8           | 104.8               |
| 20       | -                   |                  | 196.1               | 2''''     | 3.95 dd             | 8.4, 7.8      | 74.8                |
| 21       | 2.22 s              |                  | 26.9                | 3''''     | 4.05 dd             | 8.8, 8.4      | 78.5                |
|          |                     |                  |                     | 4''''     | 4.09 m              |               | 70.5                |
|          |                     |                  |                     | 5'''' a   | 4.21 dd             | 11.4, 4.8     | 67.1                |
|          |                     |                  |                     | b         | 3.66 dd             | 11.4, 10.8    |                     |

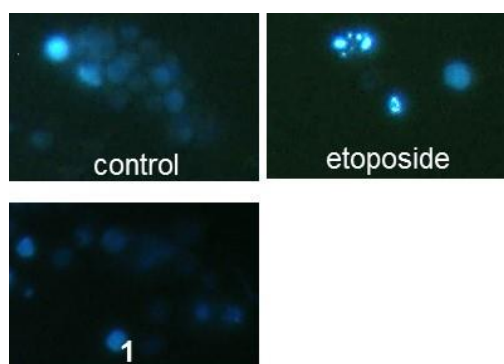

Fig. 1 Morphological observations of representative fields of HL-60 cells stained with DAPI to evaluate fragmented and condensed unclear chromatin after treatment with **1** (20 nM) or etoposide (15 nM) for 3h.

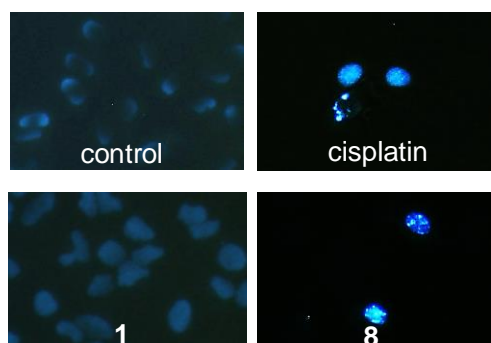

Fig. 2. Morphological observations of representative fields of A549 cells stained with DAPI to evaluate fragmented and condensed unclear chromatin after treatment with **1** (20 nM) for 3h, **8** (20 nM) or cisplatin (33 nM) for 24 h.

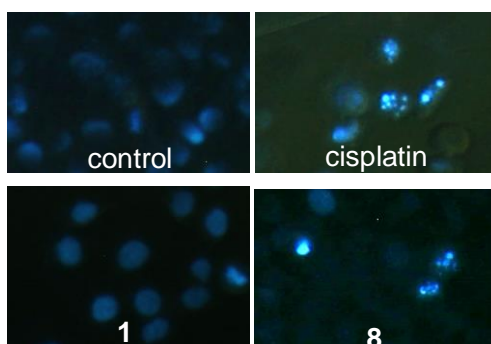

Fig.3. Morphological observations of representative fields of HSC-4 cells stained with DAPI to evaluate fragmented and condensed unclear chromatin after treatment with **1** (10 nM) for 3h, **8** (20 nM) or cisplatin (33 nM) for 48h.

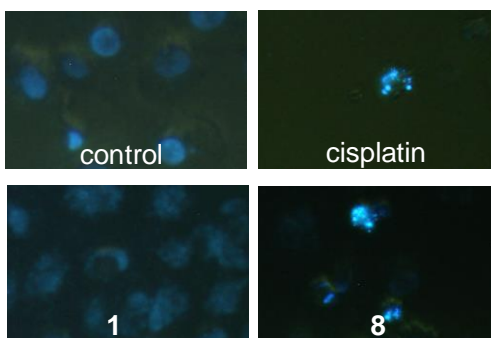

Fig. 4. Morphological observations of representative fields of HSC-2 cells stained with DAPI to evaluate fragmented and condensed unclear chromatin after treatment with **1** (10 nM) for 3h, **8** (20 nM) or cisplatin (33 nM) for 24h.
